# Supplementary material for: Tempo and mode of regulatory evolution in Drosophila
Source: HighWire-hosted journal article supplement (doi:10.1101/gr.163014.113), 2014-02-24
Supplement: Supplemental_Data_set_1_and_2.docx [file Supplemental_Data_set_1_and_2.docx]

Key for Data set 1 and 2 columns

**Data set 1: total expression values for each genotype (femaleXmale cross)**

MMP1 = D. melanogaster zhr parental from mel-mel comparison

MMP2 = D. melanogaster z30 parental from mel-mel comparison

MMH1 = zhr X z30 hybrid from mel-mel comparison

MMH2 = z30 X zhr hybrid from mel-mel comparison

SSP1 = D. simulans tsimbazaza parental from sim-sech comparison

SSP2 = D. sechellia droSec1 parental from sim-sech comparison

SSH1 = D. simulans X D. sechellia hybrid from sim-sech comparison

SSH2 = D. sechellia X D. simulans hybrid from sim-sech comparison

MSP1 = D. melanogaster zhr parental from mel-sim comparison

MSP2 = D. simulans tsimbazaza parental from mel-sim comparison

MSH1 = D. melanogaster X D. simulans hybrid from mel-sim comparison

MSH2 = D. simulans XD. melanogaster hybrid from mel-sim comparison

**Data set 2: ASE values for each genotype (femaleXmale cross)**

MMP1 = D. melanogaster zhr parental from mel-mel comparison

MMP2 = D. melanogaster z30 parental from mel-mel comparison

MMH11= zhr X z30 hybrid zhr allele from mel-mel comparison

MMH12= zhr X z30 hybrid z30 allele from mel-mel comparison

MMH21= z30 X zhr hybrid zhr allele from mel-mel comparison

MMH22= z30 X zhr hybrid z30 allele from mel-mel comparison

SSP1 = D. simulans tsimbazaza parental from sim-sech comparison

SSP2 = D. sechellia droSec1 parental from sim-sech comparison

SSH11 = D. simulans X D. sechellia hybrid sim allele from sim-sech comparison

SSH12 = D. simulans X D. sechellia hybrid sech allele from sim-sech comparison

SSH21 = D. sechellia X D. simulans hybrid sim allele from sim-sech comparison

SSH22 = D. sechellia X D. simulans hybrid sech allele from sim-sech comparison

MSP1 = D. melanogaster zhr parental from mel-sim comparison

MSP2 = D. simulans tsimbazaza parental from mel-sim comparison

MSH11 = D. melanogaster X D. simulans hybrid mel allele from mel-sim comparison

MSH12 = D. melanogaster X D. simulans hybrid sim allele from mel-sim comparison

MSH21 = D. simulans XD. melanogaster hybrid mel allele from mel-sim comparison

MSH22 = D. simulans XD. melanogaster hybrid sim allele from mel-sim comparison
