# Supplementary material for: Tempo and mode of regulatory evolution in Drosophila
Source: HighWire-hosted journal article supplement (doi:10.1101/gr.163014.113), 2014-02-24
Supplement: Supplemental_Materials.pdf [file Supplemental_Materials.pdf]

## SUPPLEMENTAL METHODS

### *Resequencing and genome assembly*

Production of the *zhr* and *z30* genomes was previously described in Coolon et al. (2012). To construct the *D. simulans* *tsimbazaza* and *D. sechellia* *droSec1* genomes, gDNA sequence reads from *D. sechellia* *droSec1* and *D. simulans* *Tsimbazaza* were aligned to the *D. simulans* and *D. sechellia* genome assemblies respectively (Drosophila 12 Genomes Consortium 2007) using BWA (Li and Durbin 2010) (version 0.5.6). Each read was aligned separately using default parameters, and SAM format files were generated using the BWA *sampe* command. Alignment files were converted to BAM format, and VCF files describing single nucleotide polymorphisms (SNPs) and indels were created using the SAMtools package (Li et al. 2009) (version 0.1.7a; modules view, sort, and pileup). SNP and indel calls were filtered using the samtools.pl varFilter command (as described at <http://samtools.sourceforge.net/cns0.shtml>) to retain SNPs and indels with *phred* scale quality scores of 20 or higher.

The public reference genomes of *D. simulans* and *D. sechellia* were originally sequenced at a coverage depth of 3- and 5-fold, respectively. This low coverage left large genomic regions unfinished. To close these gaps, we realigned gDNA sequences to the SNP and indel corrected genomes. Unmapped read-pairs were assembled into contigs with Velvet (Zerbino and Birney 2008). Contigs whose ends both aligned to the genomes were considered “gap spanning”, and extended 100 bp in each direction. Velvet assembled contigs (including gap-spanning) were aligned to the *D. melanogaster* reference genome (dm3) using LASTZ (Harris 2007). Contigs that aligned uniquely to *D. melanogaster* were retained as the “extra genome”, and comprised 12.6 and 1.6 Mb of sequence from *D. simulans* and *D. sechellia*, respectively. liftOver coordinate files were assigned to extra-genome contigs using the axtChain, chainNet, and netChainSubset utilities from the UCSC Genome Browser (Kent et al. 2002). gDNA sequence reads were then remapped to identify SNPs and indels in the extra genome, and genome sequences were rewritten accordingly.

Despite our initial inbreeding, SAMtools identified residual heterozygosity at some sites in each genotype. This complicates allele-specific RNA-seq when one of the alleles segregating in strain 1 matches the allele that is invariant in strain 2. For example, consider a site polymorphic for A and C in *zhr*, but fixed for C in *Tsimbazaza*. RNA-seq reads originating from the *Tsimbazaza* allele would align to genome sequences for both strains, whereas reads originating from the *zhr* allele would align only to the *zhr* genome. To eliminate the impact of such sites on measures of allele-specific expression, we changed such sites to the polymorphic genotype in both strains using a custom Perl script (snp\_compare\_filter.pl), effectively making these sites uninformative for allele assignment and producing comparison and strain specific genomes.

These comparison- and strain-specific genome sequences were produced using a custom Perl script (snp\_adder.pl). This script sequentially rewrites the corresponding genome with corrected SNP calls and indels. The positions of insertions and deletions were recorded in custom liftOver chain files during the rewriting process. These chain files allowed the conversion of genomic features between strains and reference genomes using the UCSC Genome Browser

liftOver tool (<http://genome.ucsc.edu>) (Kent et al. 2002). All genome and chain files are available upon request.

### ***Mapping sequencing reads to genes and alleles***

We aligned each mate of the paired-end RNA-seq reads separately to the strain- or species-specific genomes specific to each comparison using the MOSAIK aligner (version 1.0.1384, <http://bioinformatics.bc.edu/marthlab/Mosaik>). For example, in the *mel-mel* comparison, reads derived from *zhr*, *z30*, and the F<sub>1</sub> hybrids from reciprocal crosses between *zhr* and *z30* were each aligned to both the *zhr* and *z30* genomes that had been created specifically for the *mel-mel* comparison. Aligning reads to both parental genomes prevents the biased mapping described in prior RNA-seq studies of allele-specific expression (Degner et al. 2009; Stevenson et al. 2013). The following command line options were used for these alignments: -hs 13 -mm 0 -p24 -mph 100 -act 20. The 13 base hash size (-hs 13) option allowed >99% of ambiguous base containing regions to be seeded for alignment by MOSAIK. Reads aligning uniquely with no mismatches to one or both genomes were considered “mapped reads” and retained for analysis. After the initial 76 bp reads were aligned to both reference genomes, reads that did not map to either genome were trimmed 13 bases from the 3’ end using a custom Perl script (*fastq\_trimmer.pl*) and again aligned using MOSAIK. This was repeated three times (sequence lengths 76bp, 63bp, 50bp, 37bp). Any sequences that did not uniquely align after the final iteration were discarded.

Using the chain files created in the genome assembly process, we converted the genome coordinates from the *zhr*, *z30*, *droSec1*, and *Tsimbazaza* genomes to the sequenced *D. melanogaster dm3* coordinates using the liftOver utility from the UCSC Genome Browser (Kent et al. 2002) (<http://genome.ucsc.edu>) and a custom Perl script (*convert.pl*). Sequence reads were then filtered based on their alignment to a previously identified set of constitutively expressed exons within the *D. melanogaster* genome (McManus et al. 2010) using the intersectBed module of BEDTools (Quinlan and Hall 2010), with reads not aligning to these regions discarded. Additionally, overlapping regions in the constitutive exon set were removed using intersectBed module of BEDTools and custom scripts. Gap files were produced for each comparison and combined using the mergeBed module of BEDTools to create one gap file used for all comparisons. Sequences containing gaps in one or more genotypes were excluded. Reads were assigned to alleles based on alignments to strain-specific genomes using a custom Perl script (*classify.pl*). Because paired-end reads are derived from a single transcript, each set of paired-end reads was treated as a single read count regardless of whether one or both reads were mapped successfully.

### ***Pyrosequencing***

To evaluate the reproducibility of expression measurements derived from our RNA-seq data, we used pyrosequencing (Qiagen) to independently measure differences in total and allelic expression in the *mel-mel* and *sim-sech* comparisons. We focused our validation efforts on the *mel-mel* and *sim-sech* comparisons because they contained fewer divergent sites than the *mel-sim* comparison, making allele assignments more challenging. For the *mel-mel* comparison, we analyzed new F<sub>1</sub> hybrid and mixed parental cDNA libraries synthesized from the same RNA samples used for Illumina sequencing, incorporating variation from technical replication. These

mixed parental libraries were constructed by pooling equal amounts of RNA prior to cDNA synthesis. For the *sim-sech* comparison, we used RNA extracted from 4 biological replicate mixed parental (each containing 10 *D. simulans* and 10 *D. sechellia* flies) and F<sub>1</sub> hybrid (each containing 20 F<sub>1</sub> hybrid flies) samples to synthesize cDNA pools, incorporating variation from both technical and biological replication.

Pyrosequencing assays were developed for 10 genes in the *mel-mel* comparison and 18 genes in the *sim-sech* comparison (Table S6). Custom dispensation orders were used for the pyrosequencing reactions and custom formulas were developed for calculating relative allelic abundance (Table S6). Both gDNA and cDNA were analyzed in mixed parental and F<sub>1</sub> hybrid samples in each case. cDNA was always synthesized from total RNA using T(18)VN primers and SuperScript II (Invitrogen) according to manufacturer recommendations. gDNA was extracted from an independent pool of F<sub>1</sub> flies for *mel-mel* and sequentially from the same homogenate of flies as the RNA for each biological replicate of *sim-sech* using the protocol described in Wittkopp (2011). For *mel-mel*, pyrosequencing reactions were performed in triplicate for both the cDNA and gDNA samples. For *sim-sech*, single pyrosequencing reactions were performed on the cDNA and gDNA samples from each biological replicate.

Relative allelic abundance observed in the gDNA samples was used to normalize measurements from the corresponding cDNA samples, as described in (Wittkopp 2011). Following normalization, the mean log<sub>2</sub>-transformed ratio of relative allelic expression reported by pyrosequencing for each gene was compared to the log<sub>2</sub>-transformed ratio of relative allelic expression derived from the RNA-seq data using a type 2 regression in R.

## SUPPLEMENTAL NOTE

When using binomial exact tests to identify significant differences in relative allelic expression from RNA-seq data, p-values are not uniformly distributed when the null hypothesis ( $p = 0.5$ ) is true, violating an assumption of the widely-used false discovery rate (FDR) correction for multiple testing (Skelly et al. 2011). To better understand the non-uniformity of p-values when the null hypothesis ( $p = 0.05$ ) is true, we repeated and extended the simulations reported in Skelly et al. (2011). We followed the same simulation strategy except that we did not add a noise parameter. Specifically, we simulated allele-specific read count data by (i) sampling total allele-specific read counts (allele 1 + allele 2) for 4851 genes (the number of genes we examined for allele-specific expression) from a Poisson distribution with a mean ( $\lambda$ ) of 10, 100, 200, 500, 1000, or 2000 reads; (ii) determining the number of reads from one allele for each gene by drawing from a binomial distribution with  $p = 0.5$ , and (iii) determining the p-value from a binomial exact test comparing the reads from one allele to the total number of allele-specific reads in each case. As shown in the figure at right, the uniformity of the null p-value distribution increased with increasing total read counts.

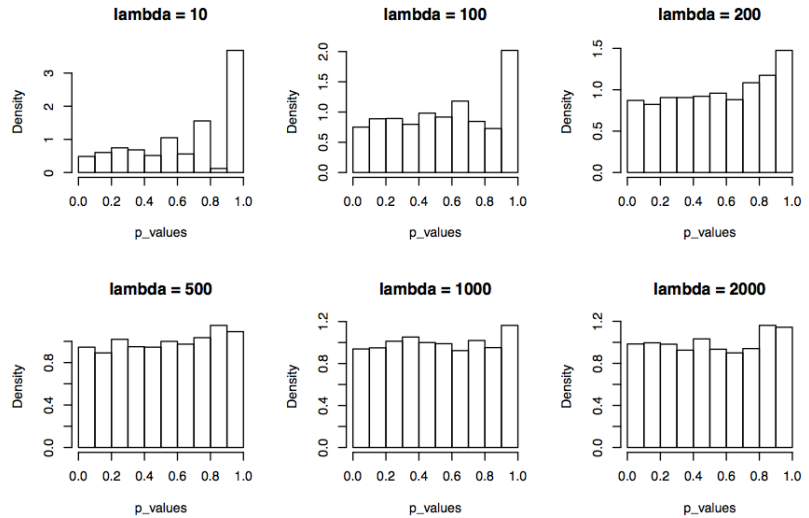

In our Dataset 2, the total number of read counts per gene ranged from 20 to 16165, with a median of 142. We repeated the simulation described above using the observed number of total allele-specific read counts for the 4851 genes and found that the distribution of p-values assuming the null hypothesis was true did indeed violate uniformity. This is important because the FDR correction uses the assumption of a uniform distribution when the null hypothesis is true to model the FDR based on the observed distribution of p-values. To determine the impact of this non-uniform distribution on the proportion of genes called significant using the  $q\text{-value} = 0.05$  cutoff we used, we artificially eliminated the over-

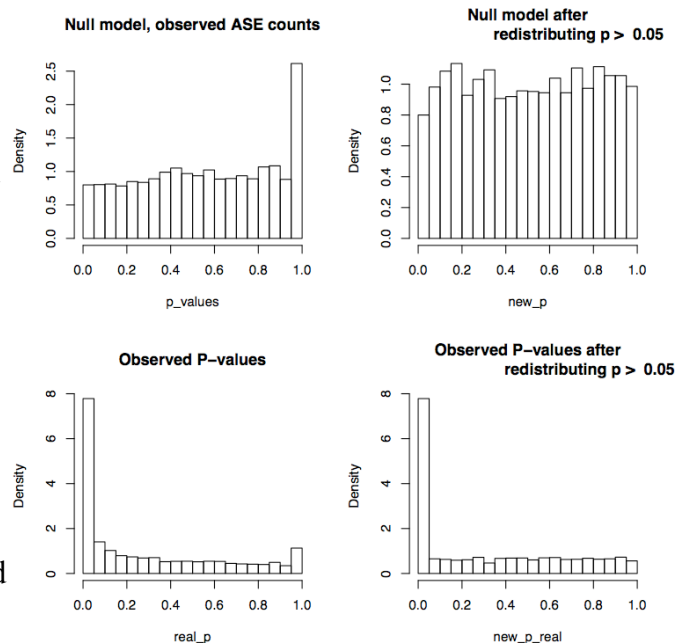

representation of large, non-significant p-values from the null model in the observed p-value distribution by replacing all p-values  $> 0.05$  with an equal number of values drawn from a uniform distribution (min = 0.05, max = 1). We did this for the dataset simulated assuming the null hypothesis was true (top panels) as well as for the p-values observed in the *mel-mel* comparison (bottom panels).

Next, we applied the FDR correction to the list of p-values from each dataset. As shown in the figure at right for the observed p-values, q-values before (black) and after (red) the redistribution of non-significant p-values are quite similar. The largest difference in q-value was for p-values between 0.2 and 0.8. With the q-value threshold (0.05) used in the paper, as well as for other q-value thresholds up to 0.1, the number of genes called significant using the FDR correction was unchanged by the redistribution of non-significant p-values (see Table below). This suggests that the non-uniformity of the BET null distribution has a negligible effect on the FDR in our study.

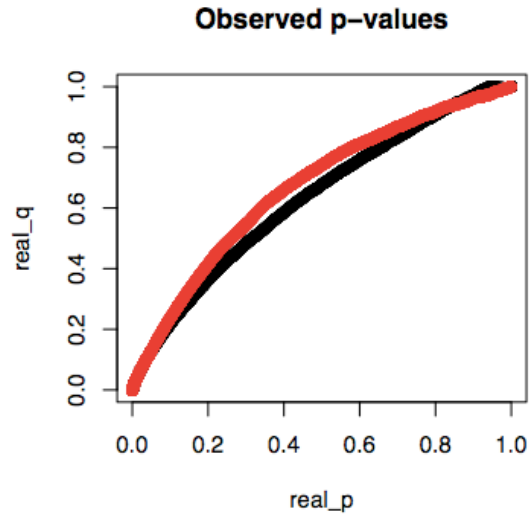

Furthermore, even if the FDR determined by the correction model was slightly higher or lower than the true FDR, it is expected to deviate similarly in all comparisons because the same number of total allele-specific read counts were considered in each case, resulting in the same null distribution. Based on these results, we conclude that the non-uniformity of the BET null distribution does not affect the comparisons of regulatory evolution across divergence times that we report.

| <b>q-value:</b>     | <b>0.01</b> | <b>0.05</b> | <b>0.1</b> | <b>0.2</b> | <b>0.3</b> | <b>0.4</b> | <b>0.5</b> | <b>0.6</b> | <b>0.7</b> |
|---------------------|-------------|-------------|------------|------------|------------|------------|------------|------------|------------|
| non-uniform null    | 1081        | 1476        | 1756       | 2162       | 2508       | 2767       | 3071       | 3347       | 3651       |
| nearly uniform null | 1081        | 1476        | 1756       | 1987       | 2153       | 2311       | 2541       | 2748       | 3094       |

## SUPPLEMENTAL REFERENCES

- Coolon JD, Stevenson KR, McManus CJ, Graveley BR, Wittkopp PJ. 2012. Genomic imprinting absent in *Drosophila melanogaster* adult females. *Cell Rep* **2**: 69–75.
- Degner JF, Marioni JC, Pai AA, Pickrell JK, Nkadori E, Gilad Y, Pritchard JK. 2009. Effect of read-mapping biases on detecting allele-specific expression from RNA-sequencing data. *Bioinformatics* **25**: 3207–3212.
- Drosophila 12 Genomes Consortium 2007. Evolution of genes and genomes on the *Drosophila* phylogeny. *Nature* **450**: 203–218.
- Harris R. 2007. Improved Pairwise Alignment of Genomic DNA. Thesis. The Pennsylvania State University.
- Kent WJ, Sugnet CW, Furey TS, Roskin KM, Pringle TH, Zahler AM, Haussler D. 2002. The human genome browser at UCSC. *Genome Res* **12**: 996–1006.
- Li H, Durbin R. 2010. Fast and accurate long-read alignment with Burrows-Wheeler transform. *Bioinformatics* **26**: 589–595.
- Li H, Handsaker B, Wysoker A, Fennell T, Ruan J, Homer N, Marth G, Abecasis G, Durbin R, 1000 Genome Project Data Processing Subgroup. 2009. The Sequence Alignment/Map format and SAMtools. *Bioinformatics* **25**: 2078–2079.
- Quinlan AR, Hall IM. 2010. BEDTools: a flexible suite of utilities for comparing genomic features. *Bioinformatics* **26**: 841–842.
- Skelly DA, Johansson M, Madeoy J, Wakefield J, Akey JM. 2011. A powerful and flexible statistical framework for testing hypotheses of allele-specific gene expression from RNA-seq data. *Genome Res* **21**: 1728–1737.
- Stevenson KR, Coolon JD, Wittkopp PJ. 2013. Sources of bias in measures of allele-specific expression derived from RNA-seq data aligned to a single reference genome. *BMC Genomics* **14**: 536.
- Wittkopp PJ. 2011. Using pyrosequencing to measure allele-specific mRNA abundance and infer the effects of *cis*- and *trans*-regulatory differences. *Methods Mol Biol* **772**: 297–317.
- Zerbino DR, Birney E. 2008. Velvet: algorithms for de novo short read assembly using de Bruijn graphs. *Genome Res* **18**: 821–829.

## SUPPLEMENTAL FIGURE LEGENDS

**Figure S1: Methodological overview.** This figure summarizes the biological samples analyzed (blue circles), the production of the raw sequencing data (green boxes), the bioinformatic methods (red boxes) used to convert the raw data into datasets 1 and 2 (blue ovals), and analyses performed on each of these datasets to examine patterns of regulatory evolution (blue boxes).

**Figure S2: Independent confirmation of relative allelic expression levels inferred from RNA-seq data.** Measures of total expression (A, B) and relative allelic expression (C) derived from RNA-seq read counts in Dataset 1 (A) and Dataset 2 (B, C) were compared to measures of total expression (A, B) and relative allelic expression (C) determined using pyrosequencing. For the *mel-mel* comparisons (red), cDNA samples analyzed by pyrosequencing were derived from the same RNAs used for Illumina sequencing (i.e., technical replicates). For the *sim-sech* comparison (blue), RNA samples extracted from new pools of flies (i.e., biological replicates) were analyzed by pyrosequencing. Coefficients of determination ( $R^2$ ) from type 2 regressions were used to compare expression measurements based on RNA-seq and pyrosequencing.

**Figure S3: Total expression levels were similar between reciprocal hybrids.**

Total expression levels, plotted as  $\log_2(\text{total read count})$  for each gene, were compared between  $F_1$  hybrids from reciprocal crosses for the *mel-mel* (A), *sim-sech* (B), and *mel-sim* (C) comparisons. Hybrid genotypes are written as maternal genotype x paternal genotype. Spearman's  $\rho$ , which makes no assumptions about normality, was used to compare the strength of the correlation in each case.

**Figure S4: Most significant expression differences between reciprocal hybrids are small in magnitude.** Volcano plots are shown for the comparison of total expression between reciprocal hybrids in the *mel-mel* (A), *sim-sech* (B), and *mel-sim* (C) comparisons. Statistical significance, represented by  $\log_{10}(\text{q-value})$ , is plotted on the Y-axis and the expression difference, plotted as  $\log_2(\text{reads from hybrid 1}/\text{reads from hybrid 2})$ , is plotted on the X-axis. Hybrid genotypes are written as maternal genotype x paternal genotype. The vertical red lines correspond to a 1.25-fold expression difference, whereas the horizontal red lines correspond to q-values with a false discovery rate of 0.05. Insets show genes with the smallest q-values in more detail.

**Figure S5 : Overall expression differences increase with divergence time.** For each gene, expression levels of individual genes are compared between the *zhr* and *z30* strains of *D. melanogaster* (A), between *D. simulans* and *D. sechellia* (B), and between *D. melanogaster* (*zhr*) and *D. simulans* (C). Expression levels are plotted as  $\log_2(\text{read count})$ . Spearman's  $\rho$ , which makes no assumptions about normality, was used to measure the overall expression similarity between genotypes in each case.

**Figure S6: Many small expression differences are statistically significant between genotypes.** Volcano plots are shown for the comparison of total expression between the *zhr* and *z30* strains of *D. melanogaster* (A), between *D. simulans* and *D. sechellia* (B), and between *D. melanogaster* (*zhr*) and *D. simulans* (C). Statistical significance, represented by  $\log_{10}(\text{q-value})$ , is

plotted on the Y-axis, and the expression difference, plotted as  $\log_2(\text{reads from genotype 1}/\text{reads from in genotype 2})$ , is plotted on the X-axis. The vertical red lines correspond to a 1.25-fold expression difference, whereas the horizontal red lines correspond to q-values with a false discovery rate of 0.05. Insets show genes with the smallest q-values in more detail.

**Figure S7: Expression differences between F<sub>1</sub> hybrids and parental species increase with divergence time.** For each gene, expression levels, plotted as  $\log_2(\text{read counts})$ , are compared between F<sub>1</sub> hybrids (Y-axis) and each of the parental species (X-axis) for the *mel-mel* (A-D), *sim-sech* (E-H) and *mel-sim* (I-L) comparisons. Hybrid genotypes are written as maternal genotype x paternal genotype. Spearman's  $\rho$ , which makes no assumptions about normality, was used to compare overall expression differences in each case.

**Figure S8: The proportion of genes showing misexpression in F<sub>1</sub> hybrids increased with divergence time of the parental genotypes.** Differences in total expression between the F<sub>1</sub> hybrid and each parental species are compared in each panel. The difference in expression level is plotted for each gene as  $\log_2(\text{reads from hybrid}) - \log_2(\text{reads from parental genotype})$ , with the difference from parent 1 shown on the X-axis and the difference from parent 2 shown on the Y-axis. Hybrid genotypes are written as maternal genotype x paternal genotype. The Y=X line shown indicates an equal difference between expression in the F<sub>1</sub> hybrid and both parents. Each gene was categorized as showing either conserved (light blue), additive (orange), underdominant (red), overdominant (blue), or dominant with expression similar to parent 1 (purple) or parent 2 (green), as described in the Methods. The pie-chart insets show the proportion of genes in each class. Interestingly, in the *mel-mel* comparison (A, D), dominant expression patterns resembled the North American *zhr* strain (parent 1) more than twice as often as they resembled the African *z30* strain (parent 2). In the *sim-sech* and *mel-sim* F<sub>1</sub> hybrids, dominant regulatory alleles were distributed more evenly between the two parental genotypes (B,E and C,F, respectively).

**Figure S9: The frequency of large expression differences between F<sub>1</sub> hybrids and parental species increases with divergence time.** Volcano plots are shown for the comparison of expression levels between F<sub>1</sub> hybrids and each parent in the *mel-mel* (A-D), *sim-sech* (E-H), and *mel-sim* (I-L) comparisons. Statistical significance, represented by  $\log_{10}(\text{q-value})$ , is plotted on the Y-axis and the expression difference, plotted as  $\log_2(\text{reads from parental genotype}/\text{reads from in hybrid genotype})$ , is plotted on the X-axis. Hybrid genotypes are written as maternal genotype x paternal genotype. The vertical red lines correspond to a 1.25-fold expression difference, whereas the horizontal red lines correspond to q-values with a false discovery rate of 0.05. Insets show genes with the smallest q-values in more detail.

**Figure S10: Allele-specific sequence reads are accurately assigned to genotypes.** Relative expression levels inferred from *in silico* “mixed parental” samples after computational assignment of reads to specific alleles (Y-axis) were compared to relative expression levels determined using the separately sequenced samples (X-axis) for the *mel-mel* (A, D, G), *sim-sech* (B, E, H), and *mel-sim* (C, F, I) comparisons. In panels A-C, both allele-specific and shared reads from the mixed parental samples were included. In panels D-F, only allele-specific reads



from the mixed parental samples were included. In panels G-I, the allele-specific read counts in Dataset 2 (i.e., after using hypergeometric sampling to equalize power among comparisons) were used. Relative expression is plotted as  $\log_2(\text{reads from genotype 1}/\text{reads from genotype 2})$  in all cases. Coefficients of determination ( $R^2$ ) from linear models were used to compare relative expression between true values and those determined for *in silico* mixed samples.

**Figure S11: Relative allelic expression was similar between reciprocal hybrids.** Measures of relative allelic expression were compared for each gene between reciprocal hybrids for the *mel-mel* (A), *sim-sech* (B), and *mel-sim* (C) comparisons. Coefficients of determination ( $R^2$ ) from linear models were used to compare relative allelic expression between reciprocal hybrids. The nine genes identified as having a statistically significant difference in relative allelic expression between reciprocal hybrids are shown in red.  $\log_2(\text{reads from allele 1}/\text{reads from allele 2})$  is plotted for each hybrid genotype. D-I, Allelic expression levels, plotted as  $\log_2(\text{allele-specific read counts})$  for each gene, are compared for each allele in reciprocal hybrids for all three comparisons. Spearman's  $\rho$ , which makes no assumptions about normality, was used to compare overall expression differences in each case. Genotypes of reciprocal hybrids are written as maternal genotype x paternal genotype.

**Figure S12: Evolution of *cis*- and *trans*-regulation.** A, Overall differences ( $1 - \rho$ ) in total expression between genotypes (blue) and allele-specific expression in  $F_1$  hybrids (red) are shown for each comparison. Relative allelic expression provides a readout of relative *cis*-regulatory activity. Data used to calculate Spearman's  $\rho$  are summarized in Figure S13. B, For each comparison, the proportion of genes with evidence of significant differences in total expression (blue), *cis*-regulation (red), and *trans*-regulation (green) are shown. Data used to determine these proportions is shown in Figure S16. C, The proportion of genes with evidence of significant *cis*- and *trans*-regulatory changes (red) is compared to the proportion of genes with evidence of *cis*- or *trans*-regulatory changes (blue). D, For genes with evidence of both *cis*- and *trans*-regulatory changes, the frequency of genes with *cis*- and *trans*-regulatory changes affecting gene expression in the same ("*cis+trans*", red) and opposite ("*cisXtrans*", blue) directions are compared. E, The relative frequencies of genes with *cis*- and *trans*-regulatory changes in opposite directions that do (blue) and do not (red) show evidence of misexpression in  $F_1$  hybrids are compared. Error bars in panel A show the 95% quantiles from 10,000 bootstrap replicates. Comparable analyses for reciprocal hybrids are shown in Figure 3.

**Figure S13: Differences in *cis*-regulatory activity increase with divergence time more rapidly than differences in total expression.** For each of the 4851 genes in Dataset 2, total expression levels, plotted as  $\log_2(\text{read count})$ , are compared between the *zhr* and *z30* strains of *D. melanogaster* (A), between *D. simulans* and *D. sechellia* (B), and between *D. melanogaster* (*zhr*) and *D. simulans* (C). Levels of allele-specific expression, plotted as  $\log_2(\text{allele-specific read count})$ , are compared between allele 1 (X-axis) and allele 2 (Y-axis) for each  $F_1$  hybrid from the *mel-mel* (D,G), *sim-sech* (E,H) and *mel-sim* (F,I) comparisons. Hybrid genotypes are written as maternal genotype x paternal genotype. Spearman's  $\rho$ , which makes no assumptions about normality, was used to measure the overall expression similarity between genotypes in each case.

**Figure S14: Differences between gene sets used to analyze total and allele-specific expression data.** Box-plots summarize the distributions of total expression differences (A) and sequence divergence (B) for the 7587 genes in Dataset 1 and the 4851 genes in Dataset 2 for the *mel-mel* (MM), *sim-sech* (SS), and *mel-sim* (MS) comparisons. The notched box-plots show the full range of values as well as the 25, 50, and 75th percentiles.

**Figure S15: Evolutionary trajectories for expression divergence of individual genes.** The line-plots show differences in total expression (A) and *cis*-regulatory activity (B) derived from Dataset 2 for individual genes in the *mel-mel*, *sim-sech*, and *mel-sim* comparisons plotted according to divergence time. As described in the main text, genes were classified into nine groups depending on whether they showed increased, decreased, or similar allele-specific expression differences between *mel-mel* and *sim-sech* and between *sim-sech* and *mel-sim*. The red line in each plot shows the median difference in *cis*-regulatory activity for genes in that class for each comparison. The pie-chart shows the relative frequency of genes in each class.

**Figure S16: The relative contributions of *cis*- and *trans*-regulatory changes to expression divergence change with divergence time.** For each gene, relative expression between parental genotypes, plotted as  $\log_2(\text{reads from parent 1} / \text{reads from parent 2})$  on the X-axis, is compared to relative allele-specific expression in F<sub>1</sub> hybrids, plotted as  $\log_2(\text{reads from allele 1} / \text{reads from allele 2})$  on the Y-axis. Hybrid genotypes are written as maternal genotype x paternal genotype. Each gene was categorized as showing either conserved *cis*- and *trans*-regulation (yellow, “conserved”), only *cis*-regulatory differences (black, “all *cis*”), only *trans*-regulatory differences (red, “all *trans*”), *cis*- and *trans*-regulatory differences with no expression difference between parental genotypes (orange, “compensatory”), or *cis*- and *trans*-regulatory differences with effects on expression in the same (blue, “*cis* + *trans*”) or opposite (green, “*cis* X *trans*”) directions, as described in the Methods and Table S5. Genes with results from significance tests inconsistent with any of these categories (see Methods) were classified as “ambiguous” (grey). The pie-chart insets show the proportion of genes in each class, for each comparison. The slopes reported in each panel are from a linear regression model fitted to the corresponding dataset. A larger slope indicates a larger contribution of *cis*-regulatory divergence to total expression divergence.

**Figure S17: Effects of *cis*-regulatory divergence.** A, The percentage of total regulatory divergence attributable to *cis*-regulatory divergence (%*cis*) is shown for the *mel-mel*, *sim-sech*, and *mel-sim* comparisons. B-D, %*cis* is compared among sets of genes with different levels of total expression differences, reported as the absolute value of the  $\log_2(\text{reads from genotype 1} / \text{reads from genotype 2})$  ratio, for the *mel-mel* (B), *sim-sech* (C), and *mel-sim* (D), comparisons. E, %*cis* is compared for sets of genes showing additive (“A”) and non-additive (“NA”, dominant or misexpression) inheritance for each comparison. In all panels, notched box-plots show the full range of values as well as the 25, 50, and 75th percentiles, with the width of the box-plots proportion to the number of genes in each class. Analyses comparable to panels A and H using reciprocal hybrids are shown in Figure 4.

## **SUPPLEMENTAL TABLES**

**Table S1: Summary of sequencing depth for RNA-seq and gDNA.**

**Table S2: Number of genes suitable for quantifying total expression in each genotype.**

**Table S3: Number of genes suitable for quantifying allele-specific expression in each genotype.**

**Table S4: Accuracy of mapping maternally inherited mitochondrial alleles in interspecific F<sub>1</sub> hybrids.**

**Table S5: Criteria for assigning genes to regulatory evolution classes.**

**Table S6: Pyrosequencing assays for quantification of allelic expression ratios.**

Figure S1

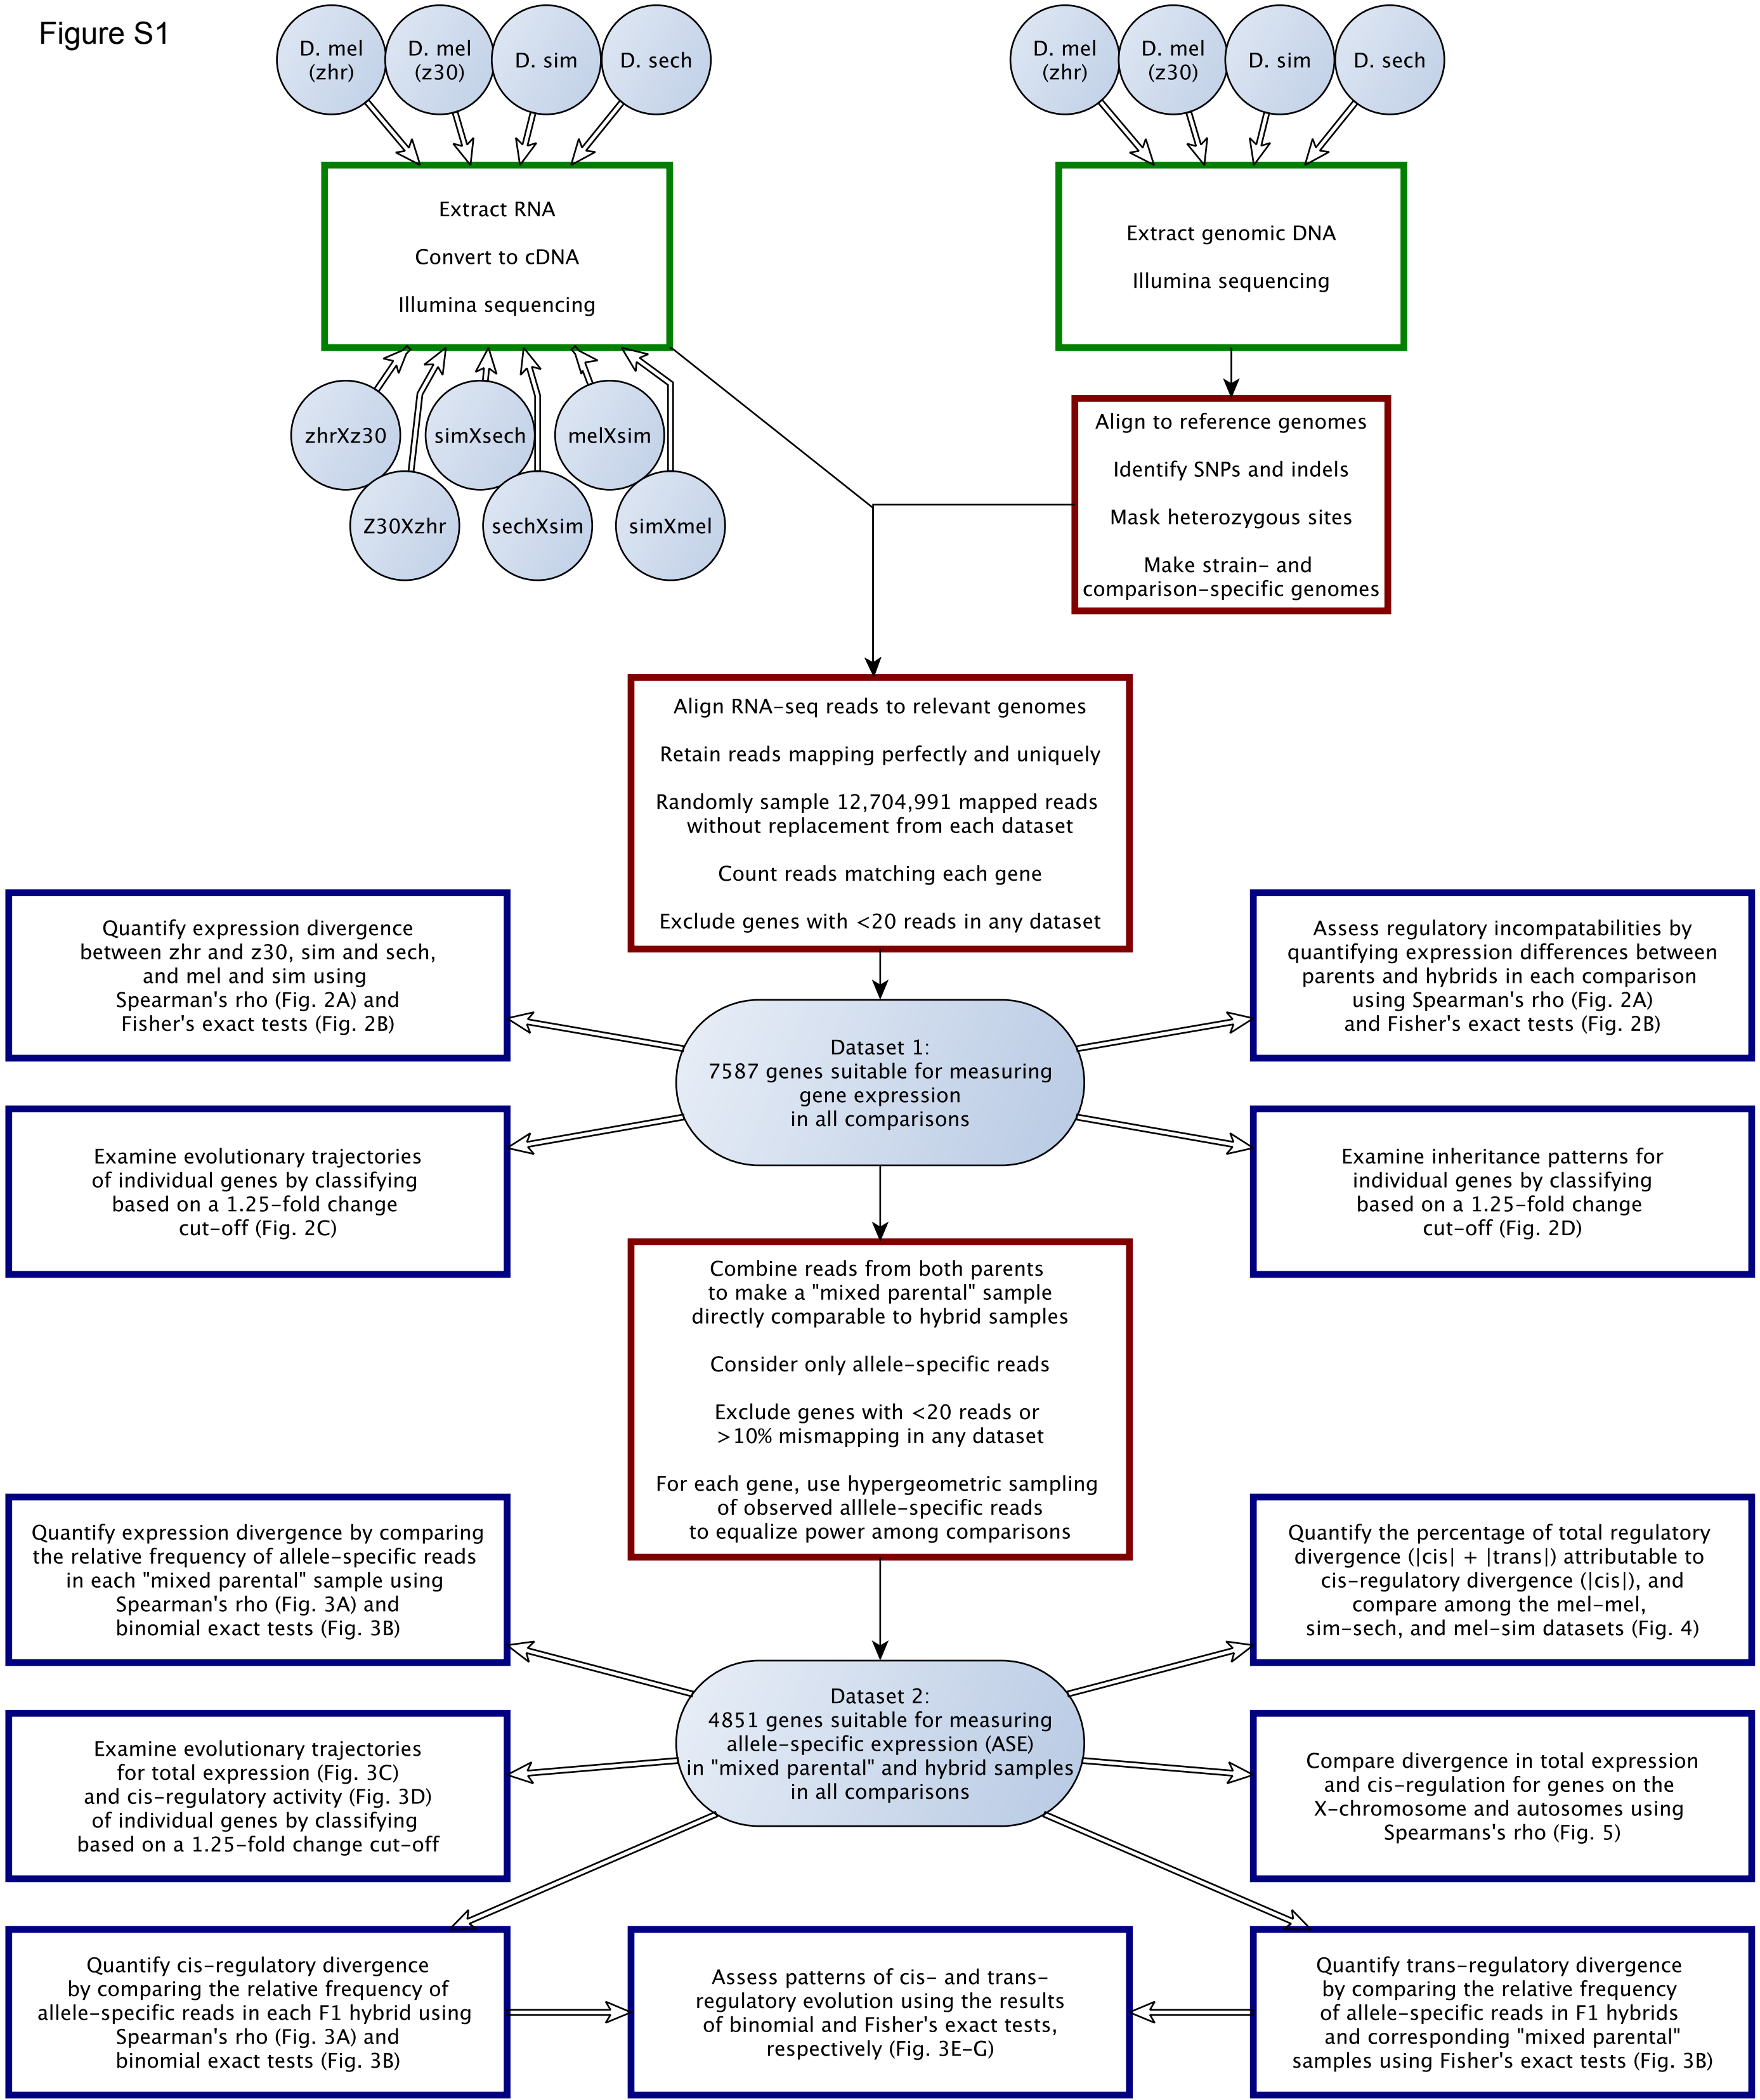

Figure S2

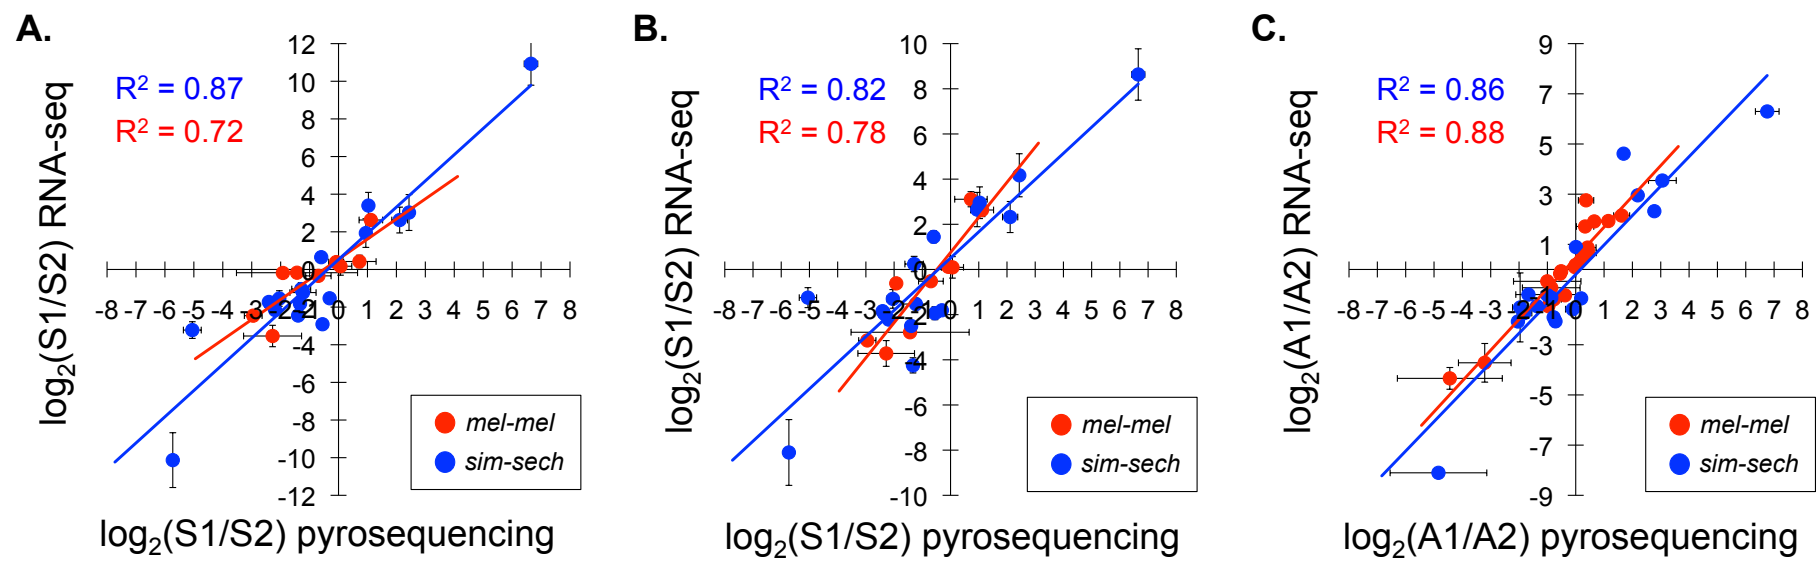

Figure S3

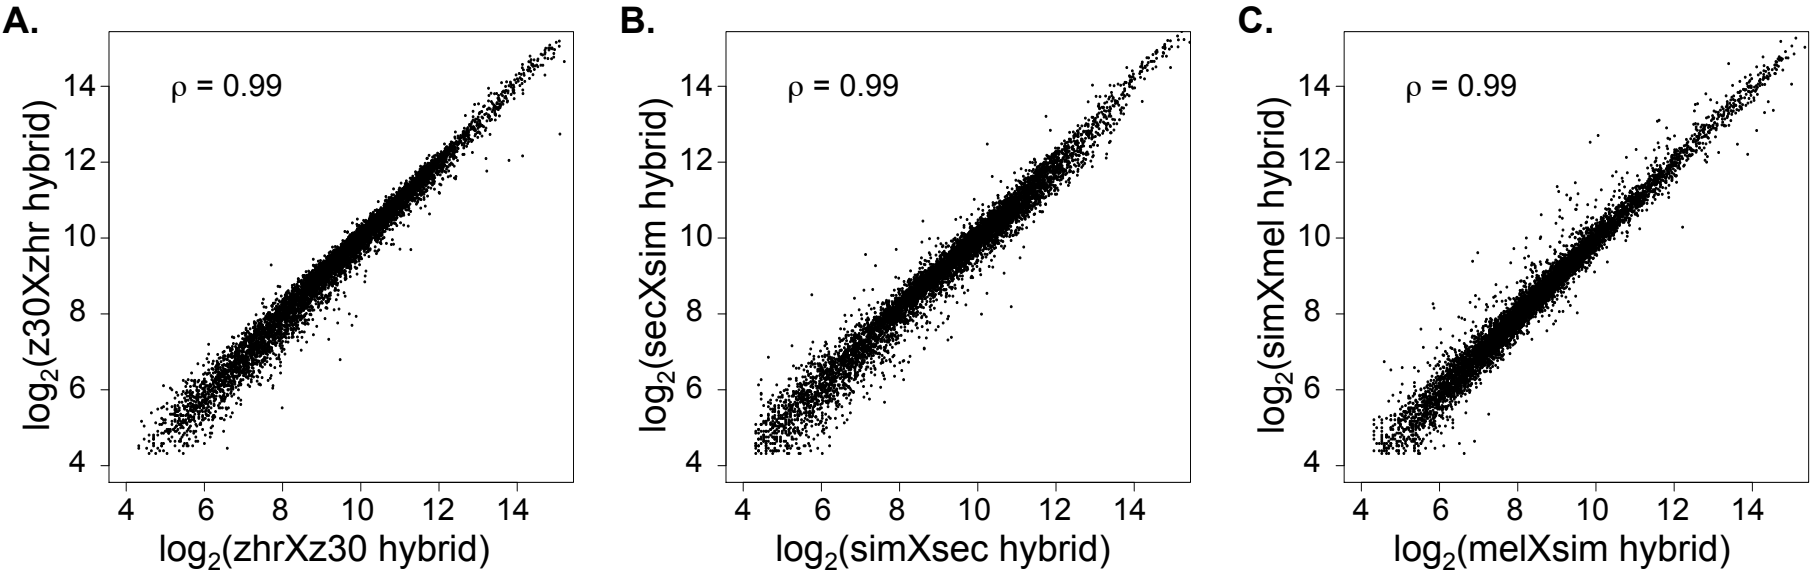

Figure S4

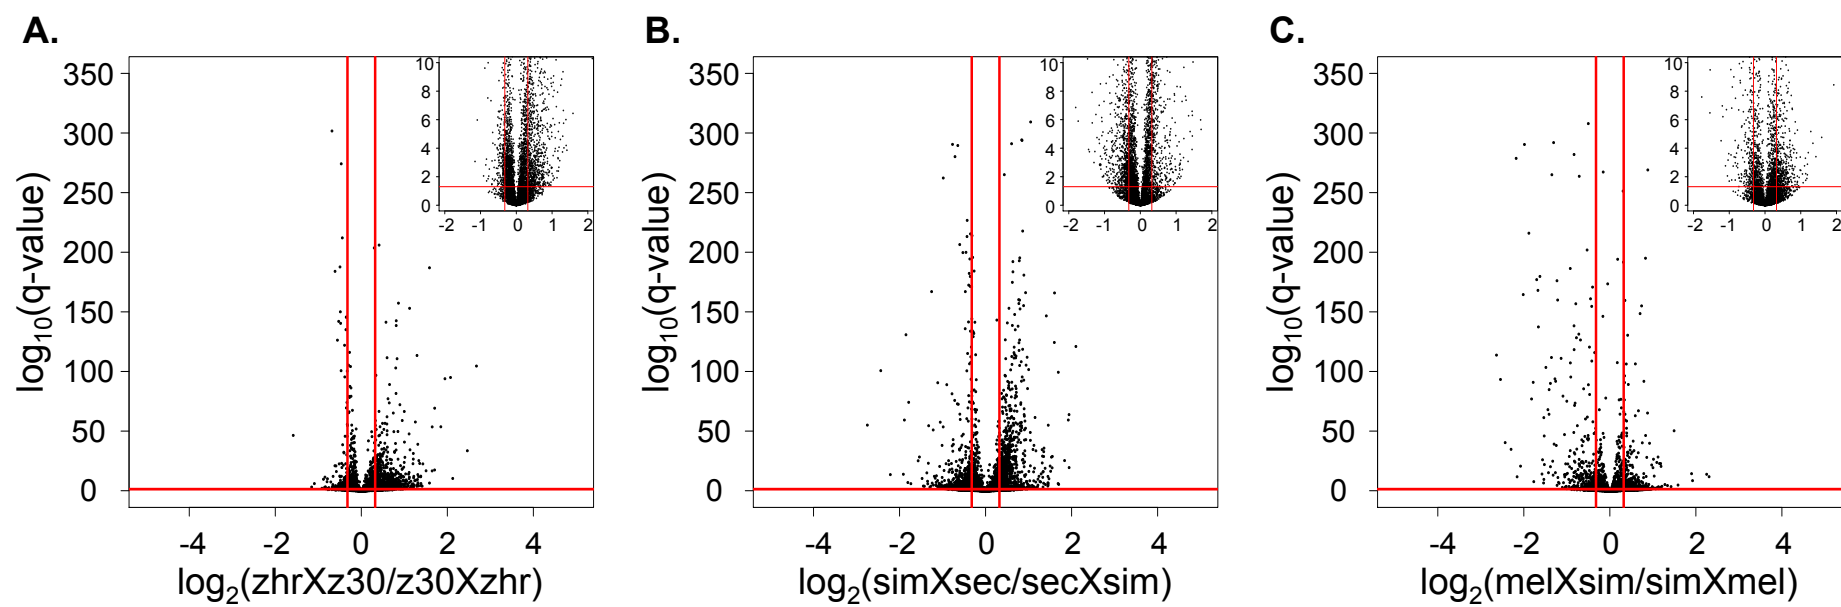

Figure S5

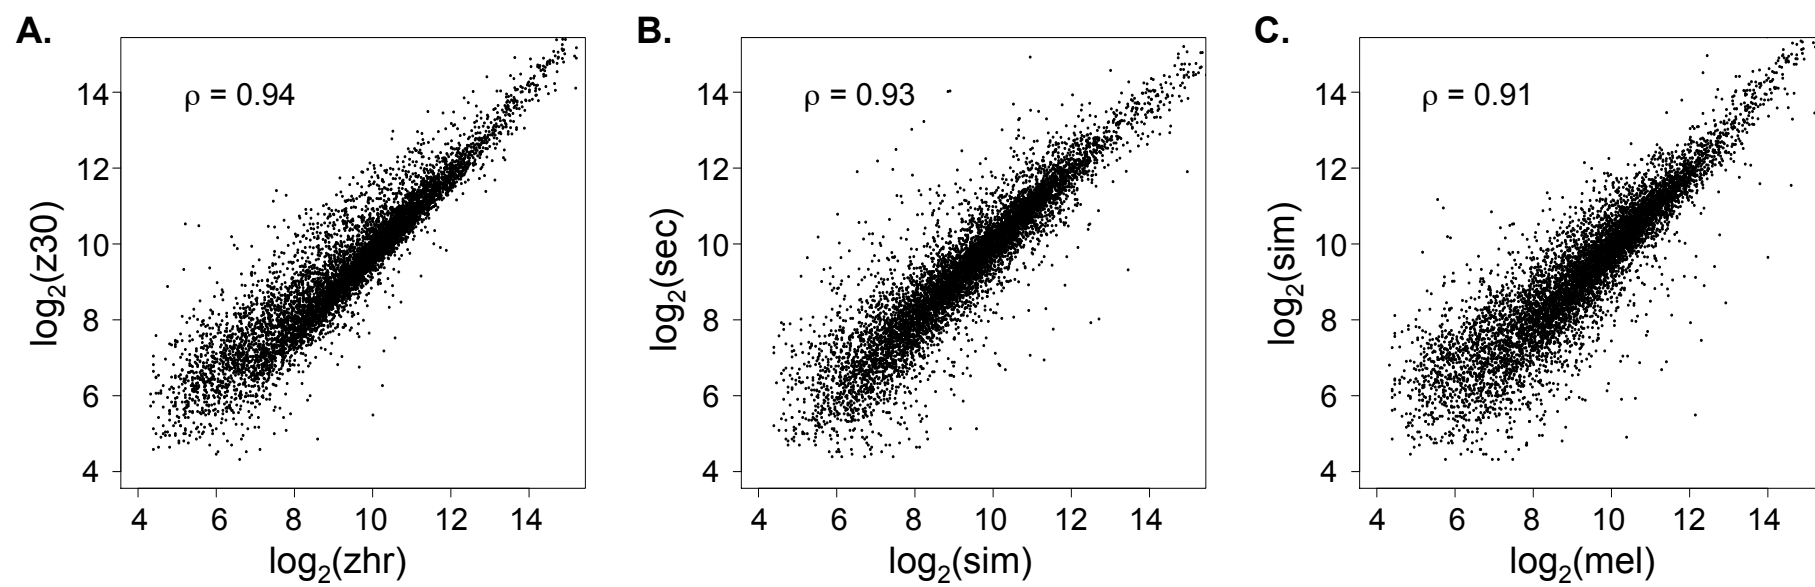



Figure S6

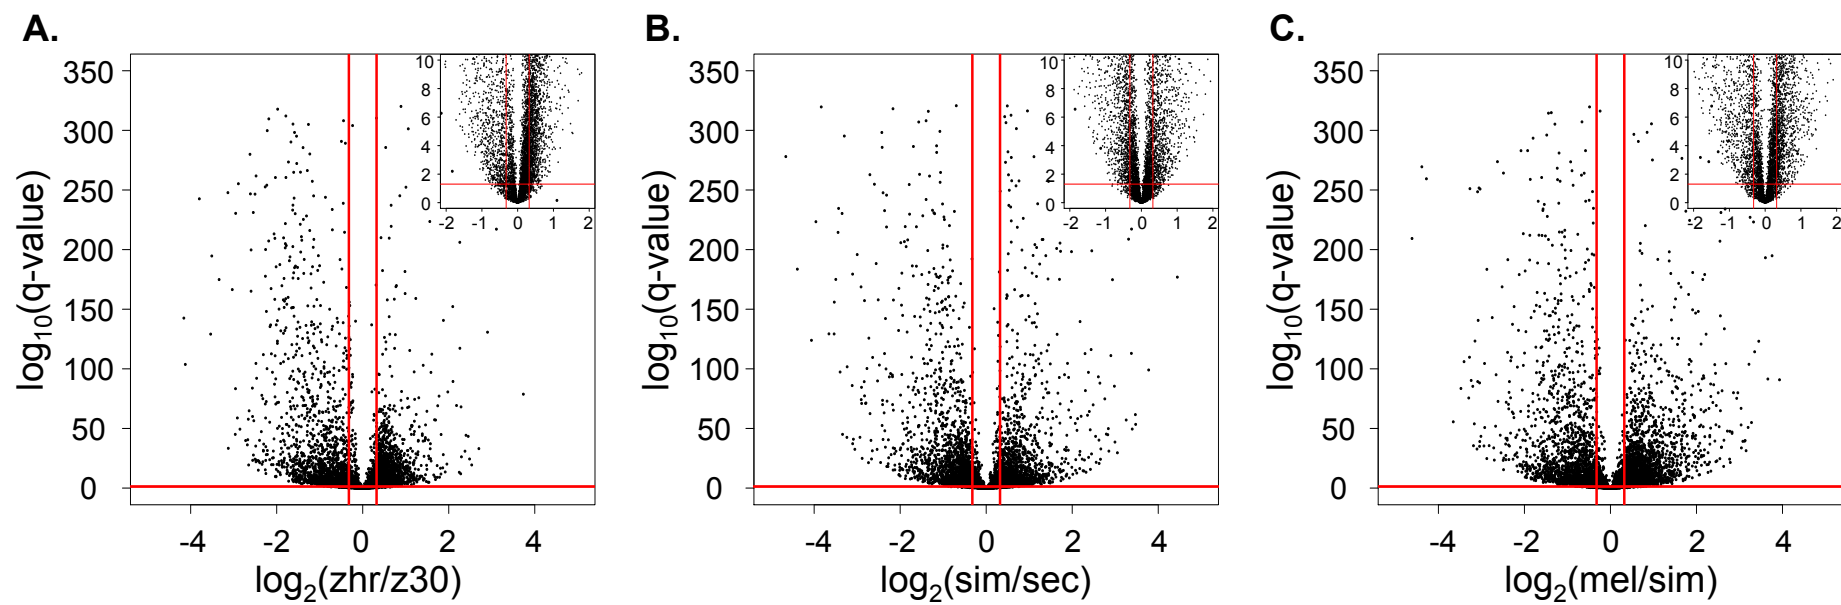

Figure S7

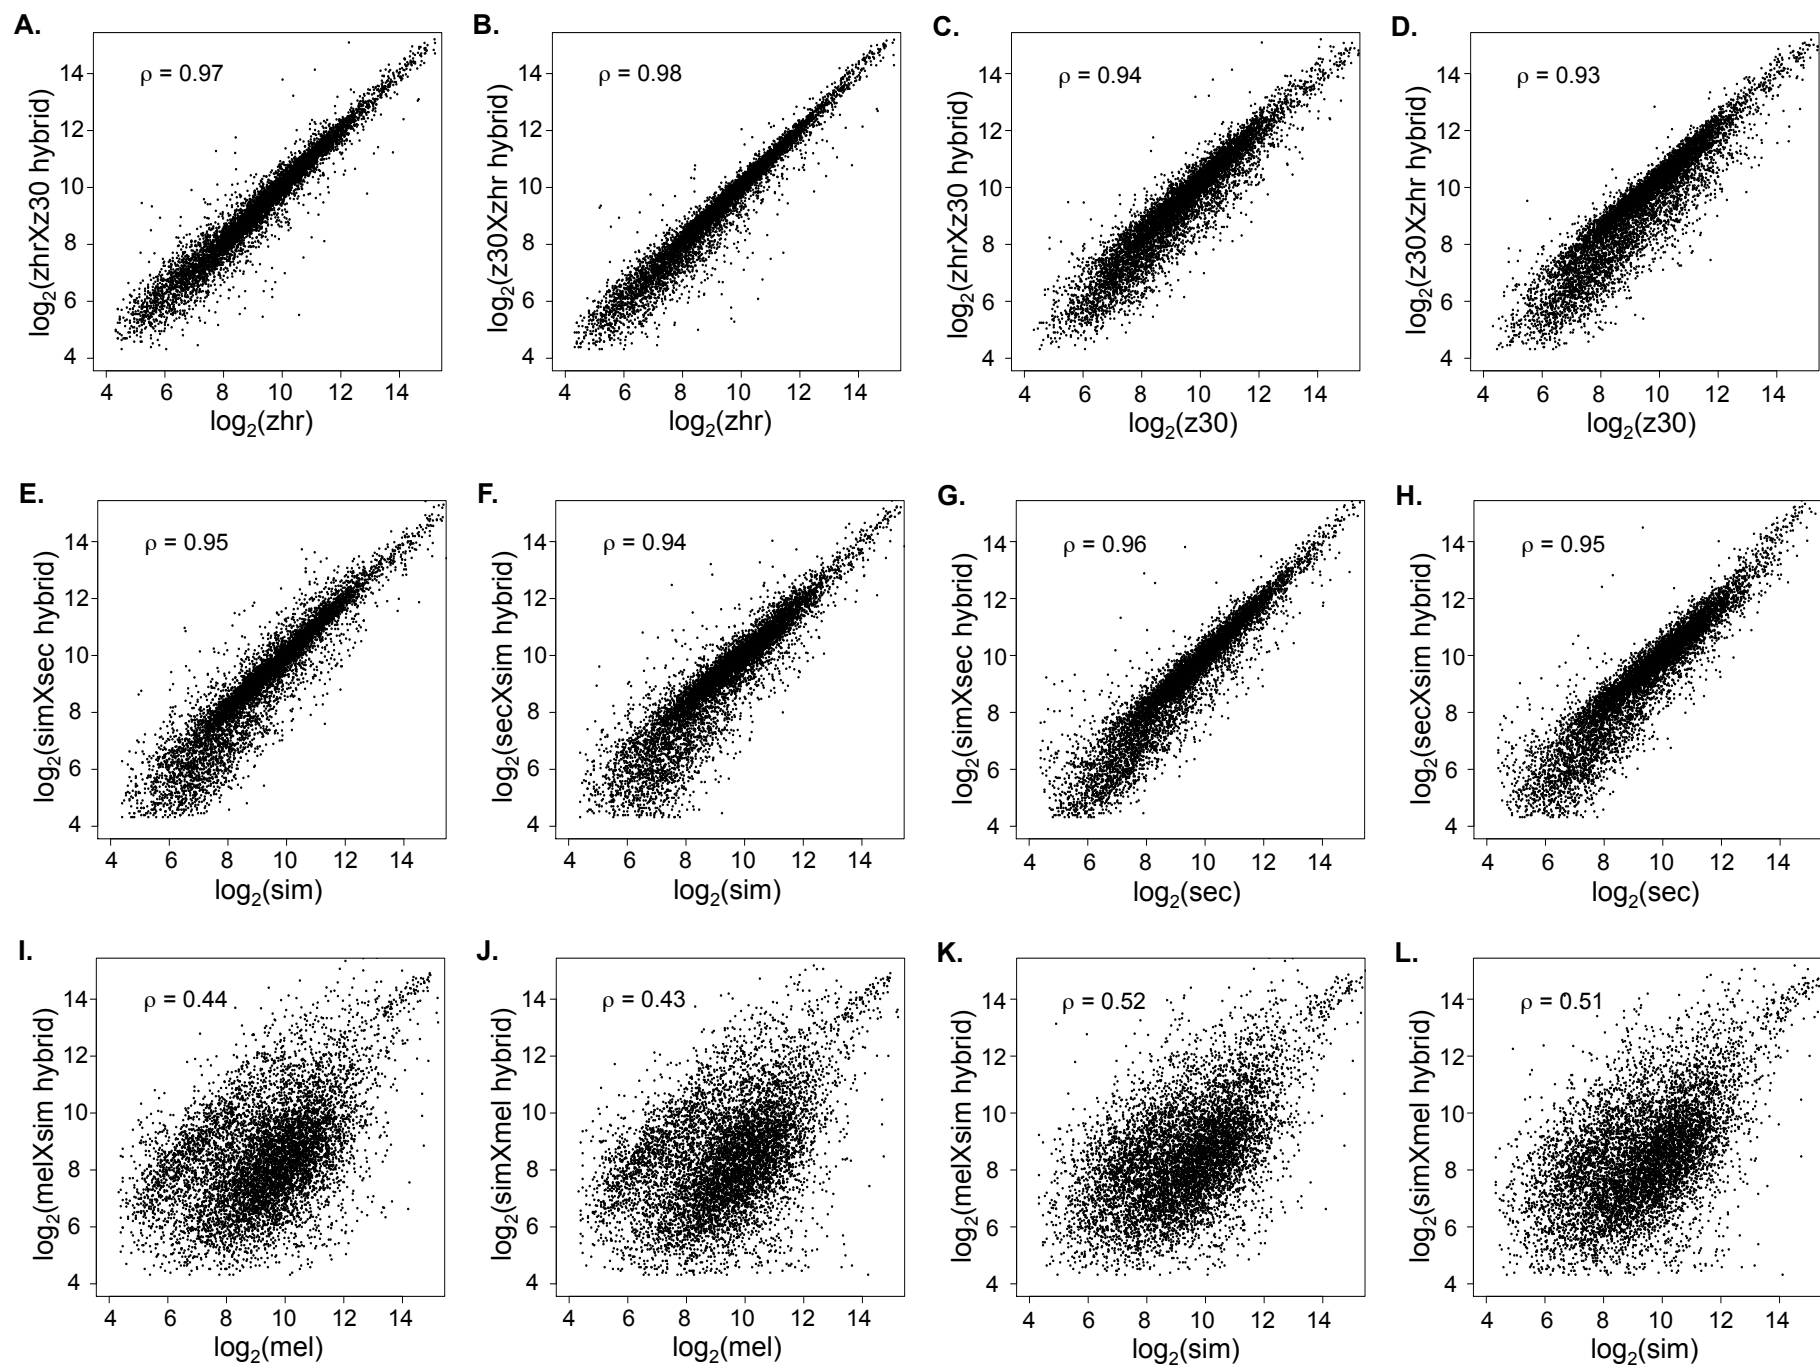

Figure S8

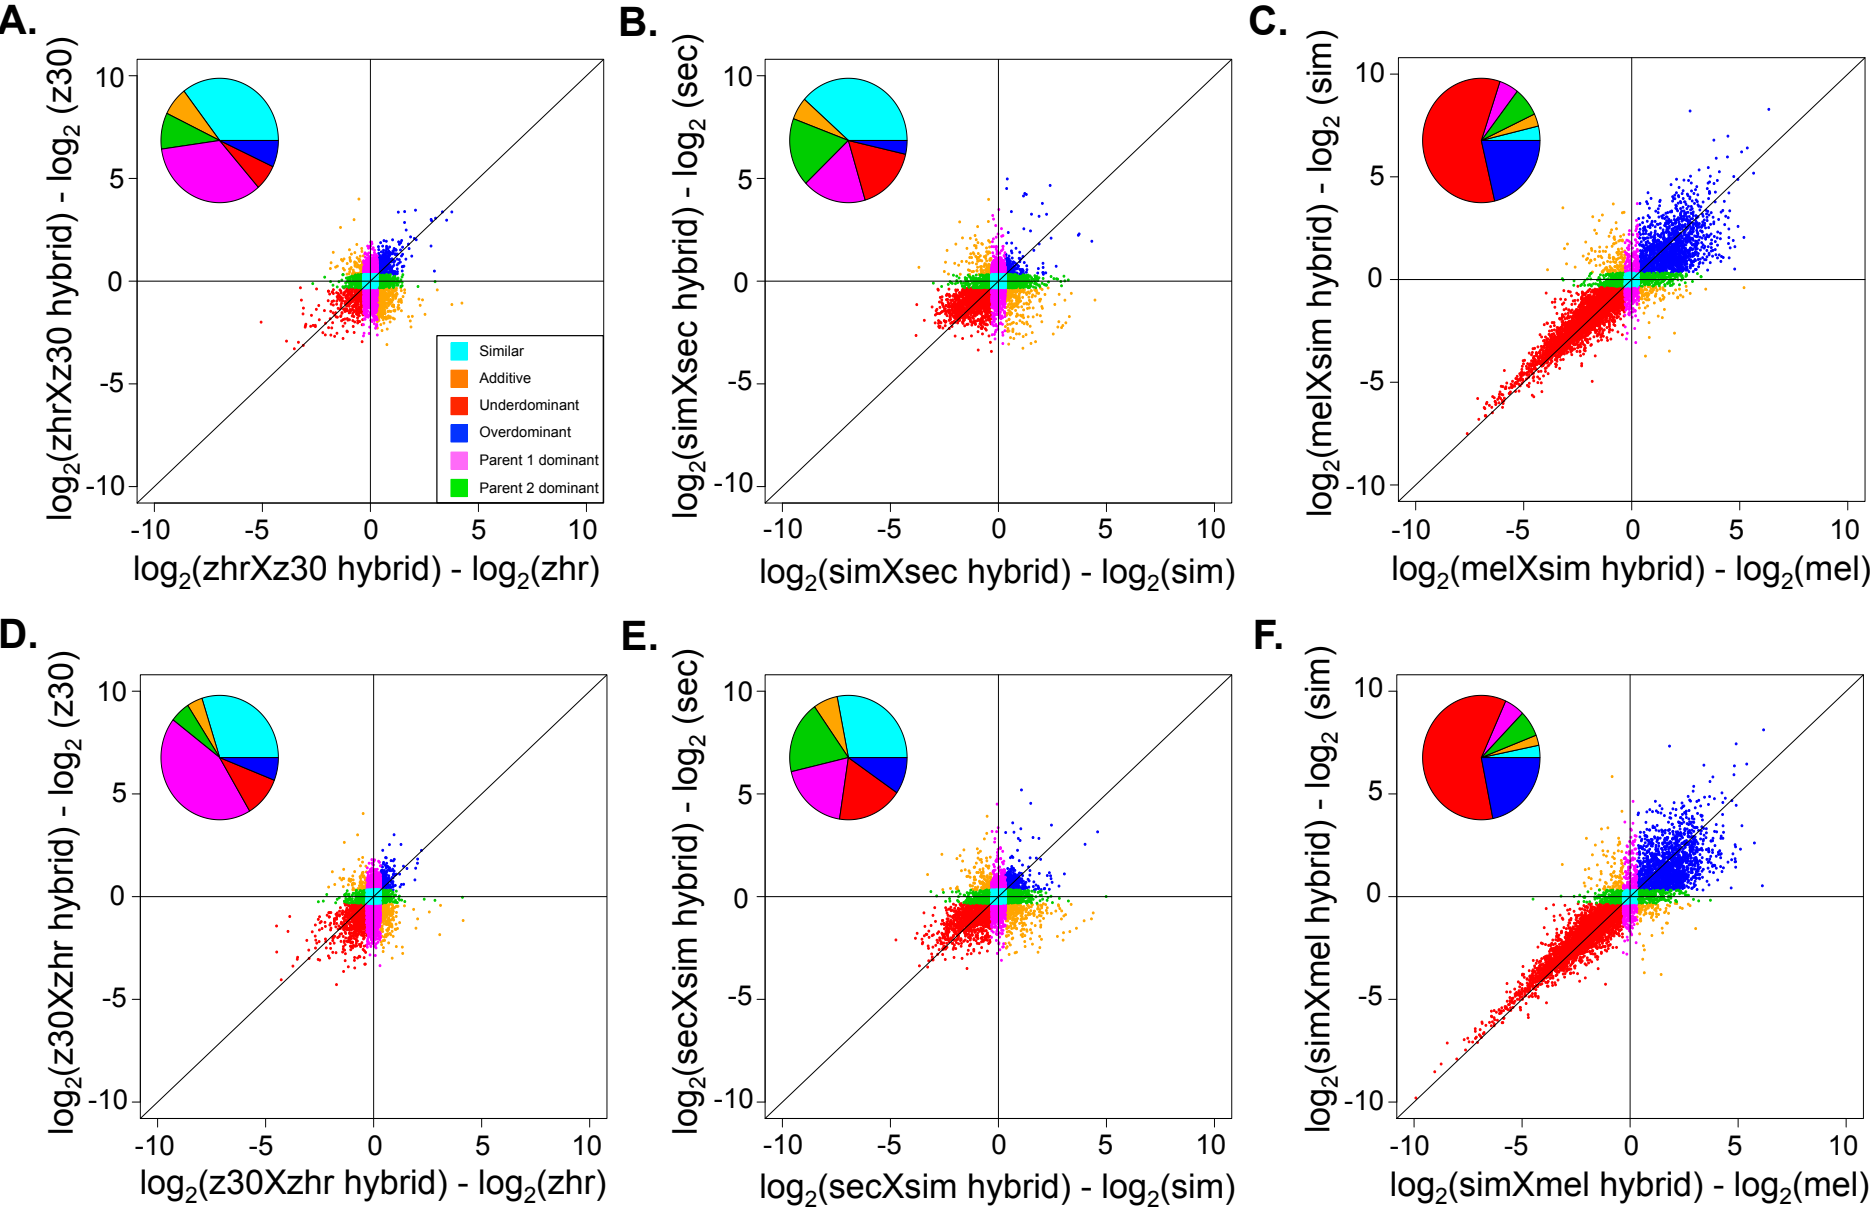

Figure S9

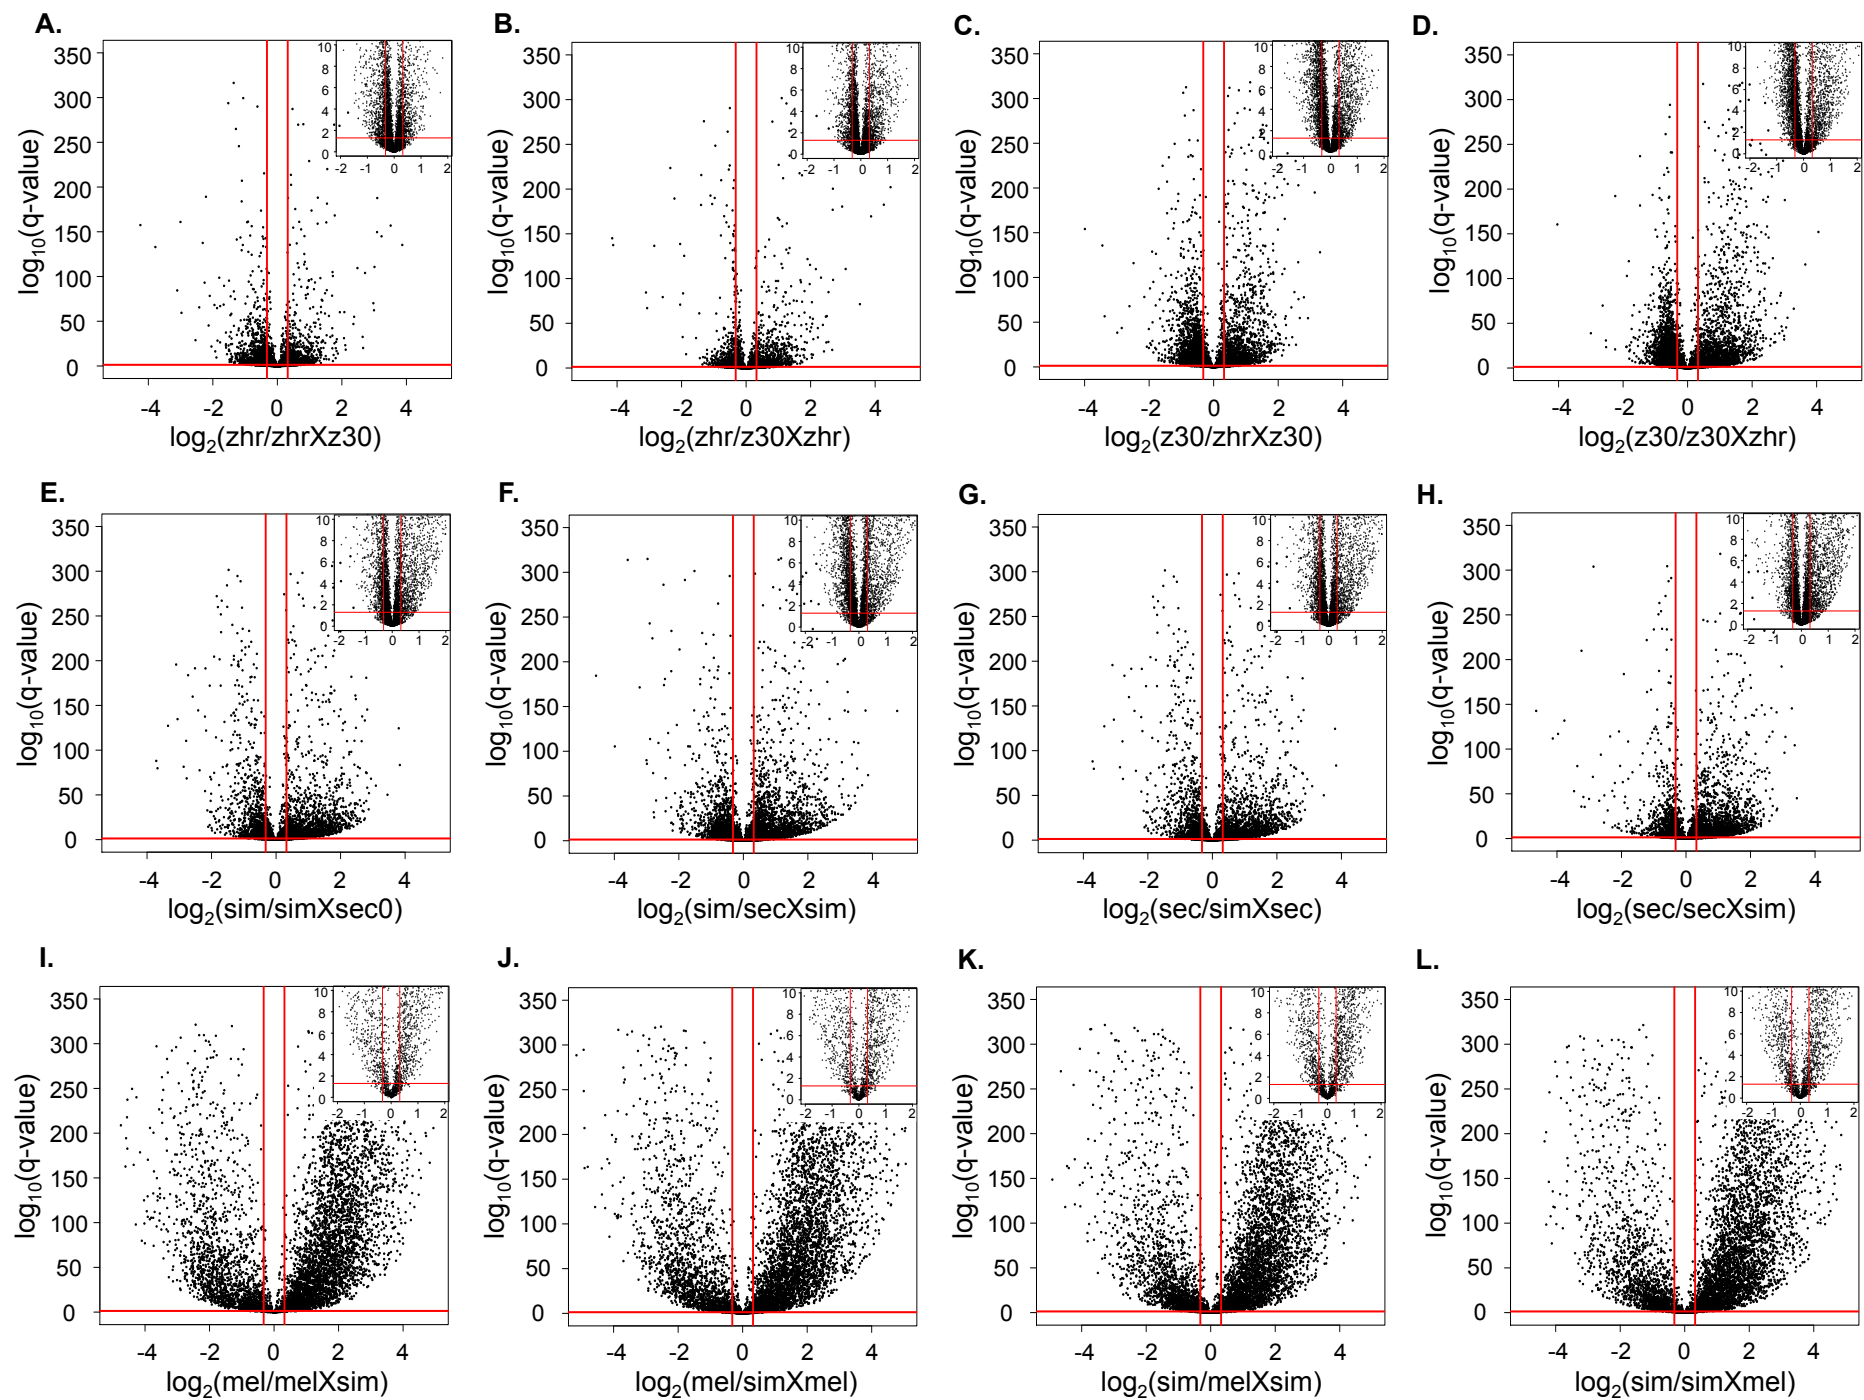

Figure S10

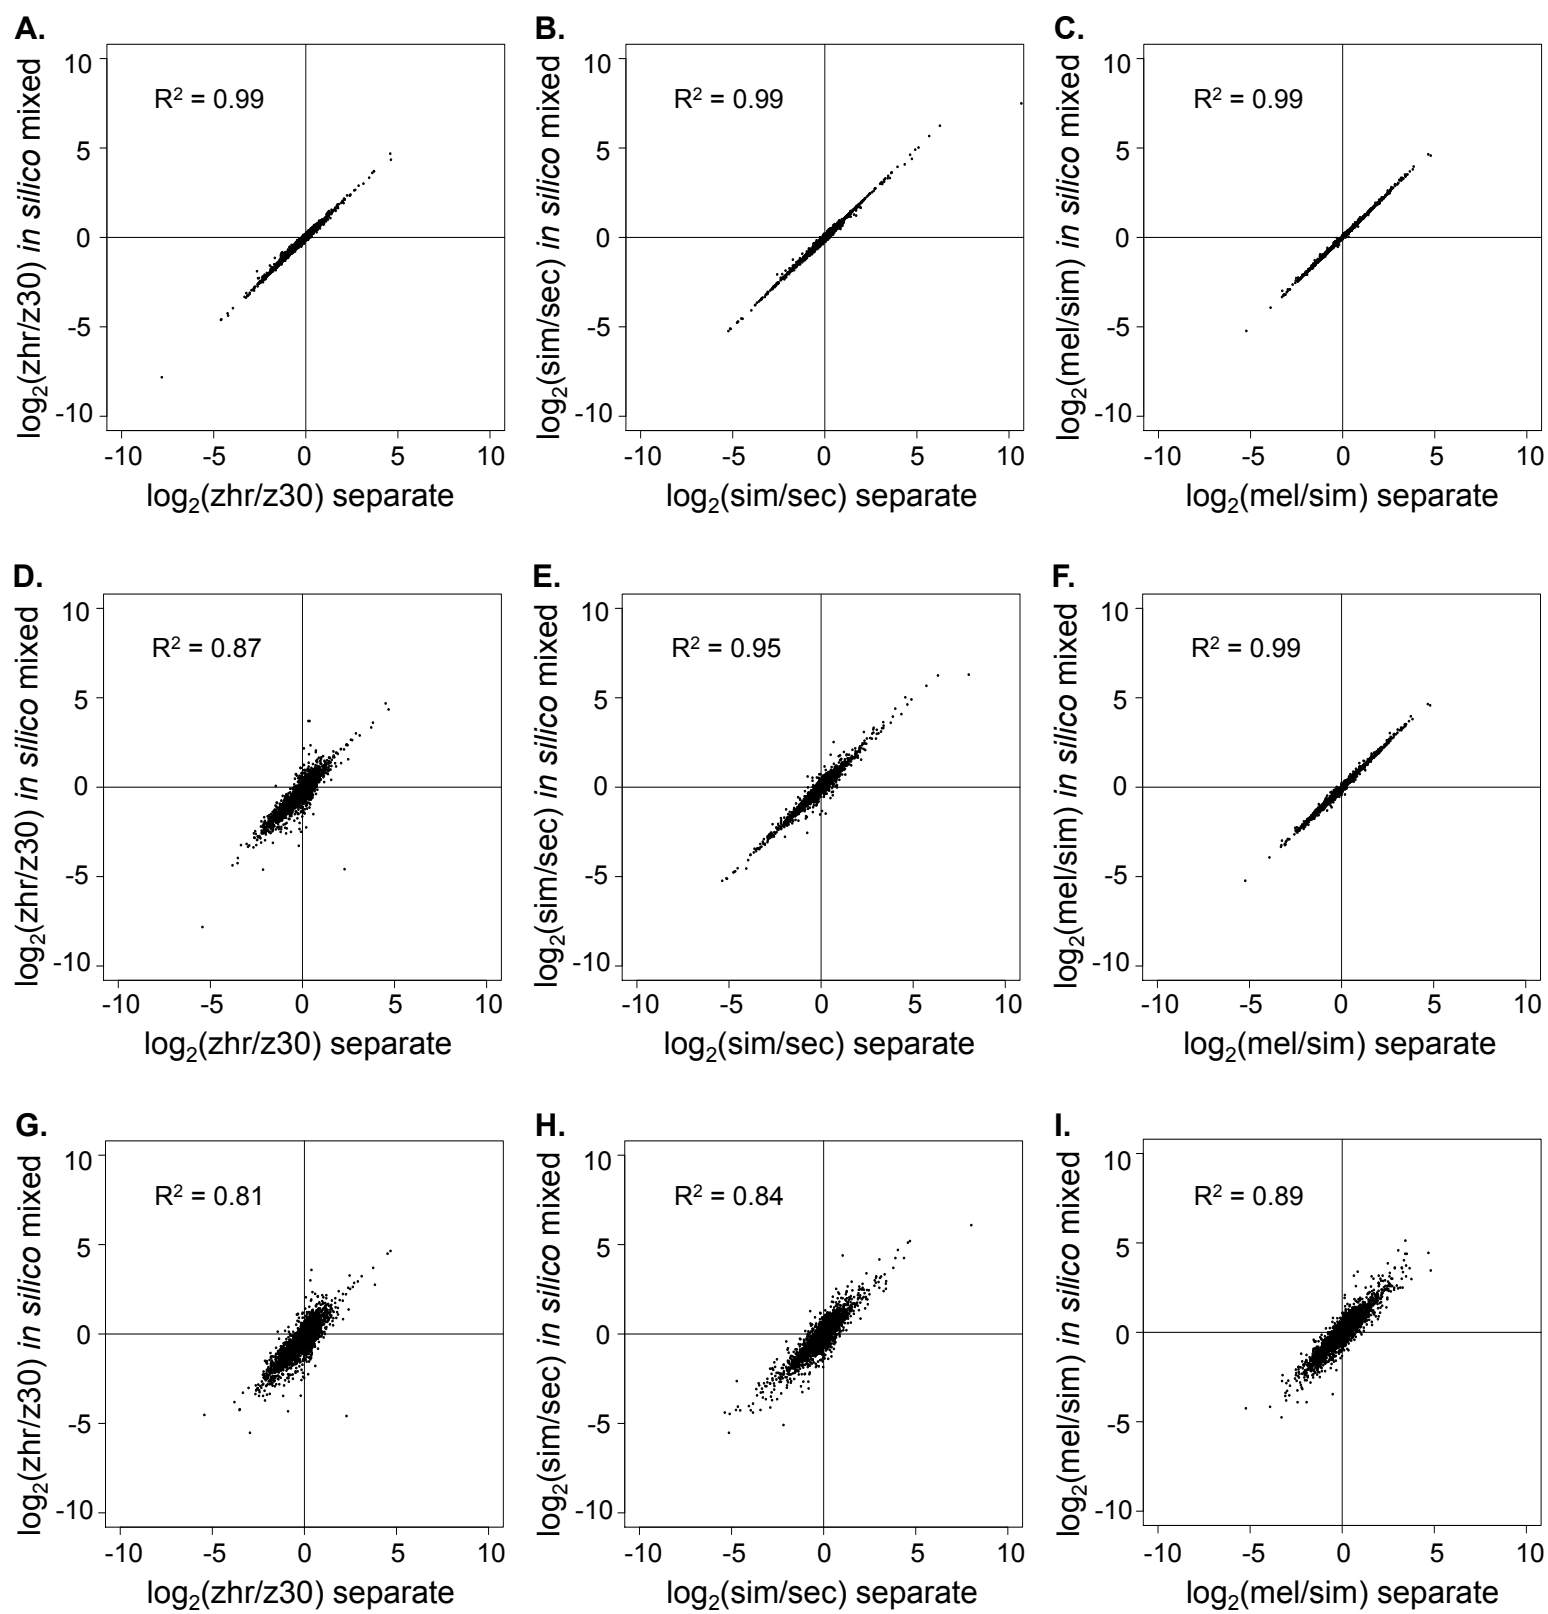

Figure S11

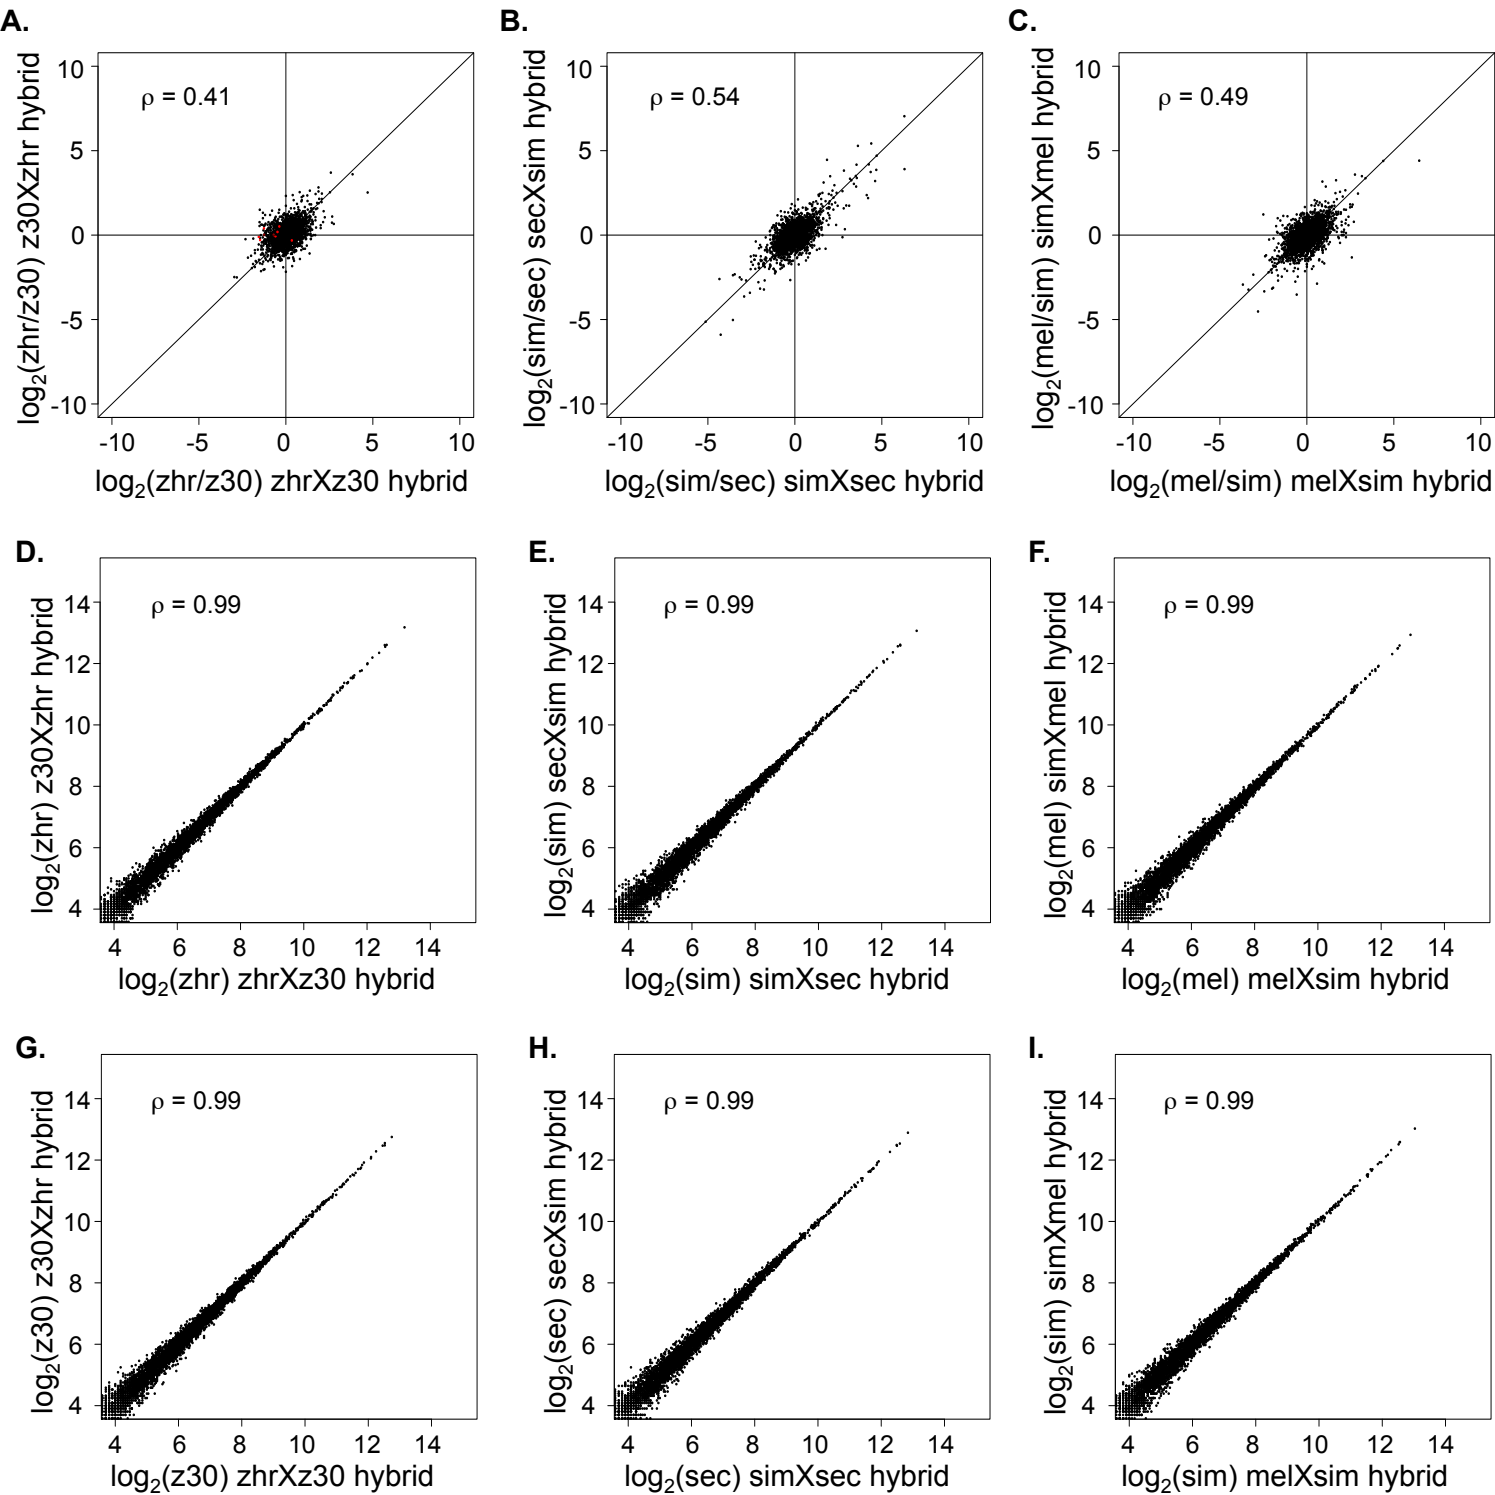

Figure S12

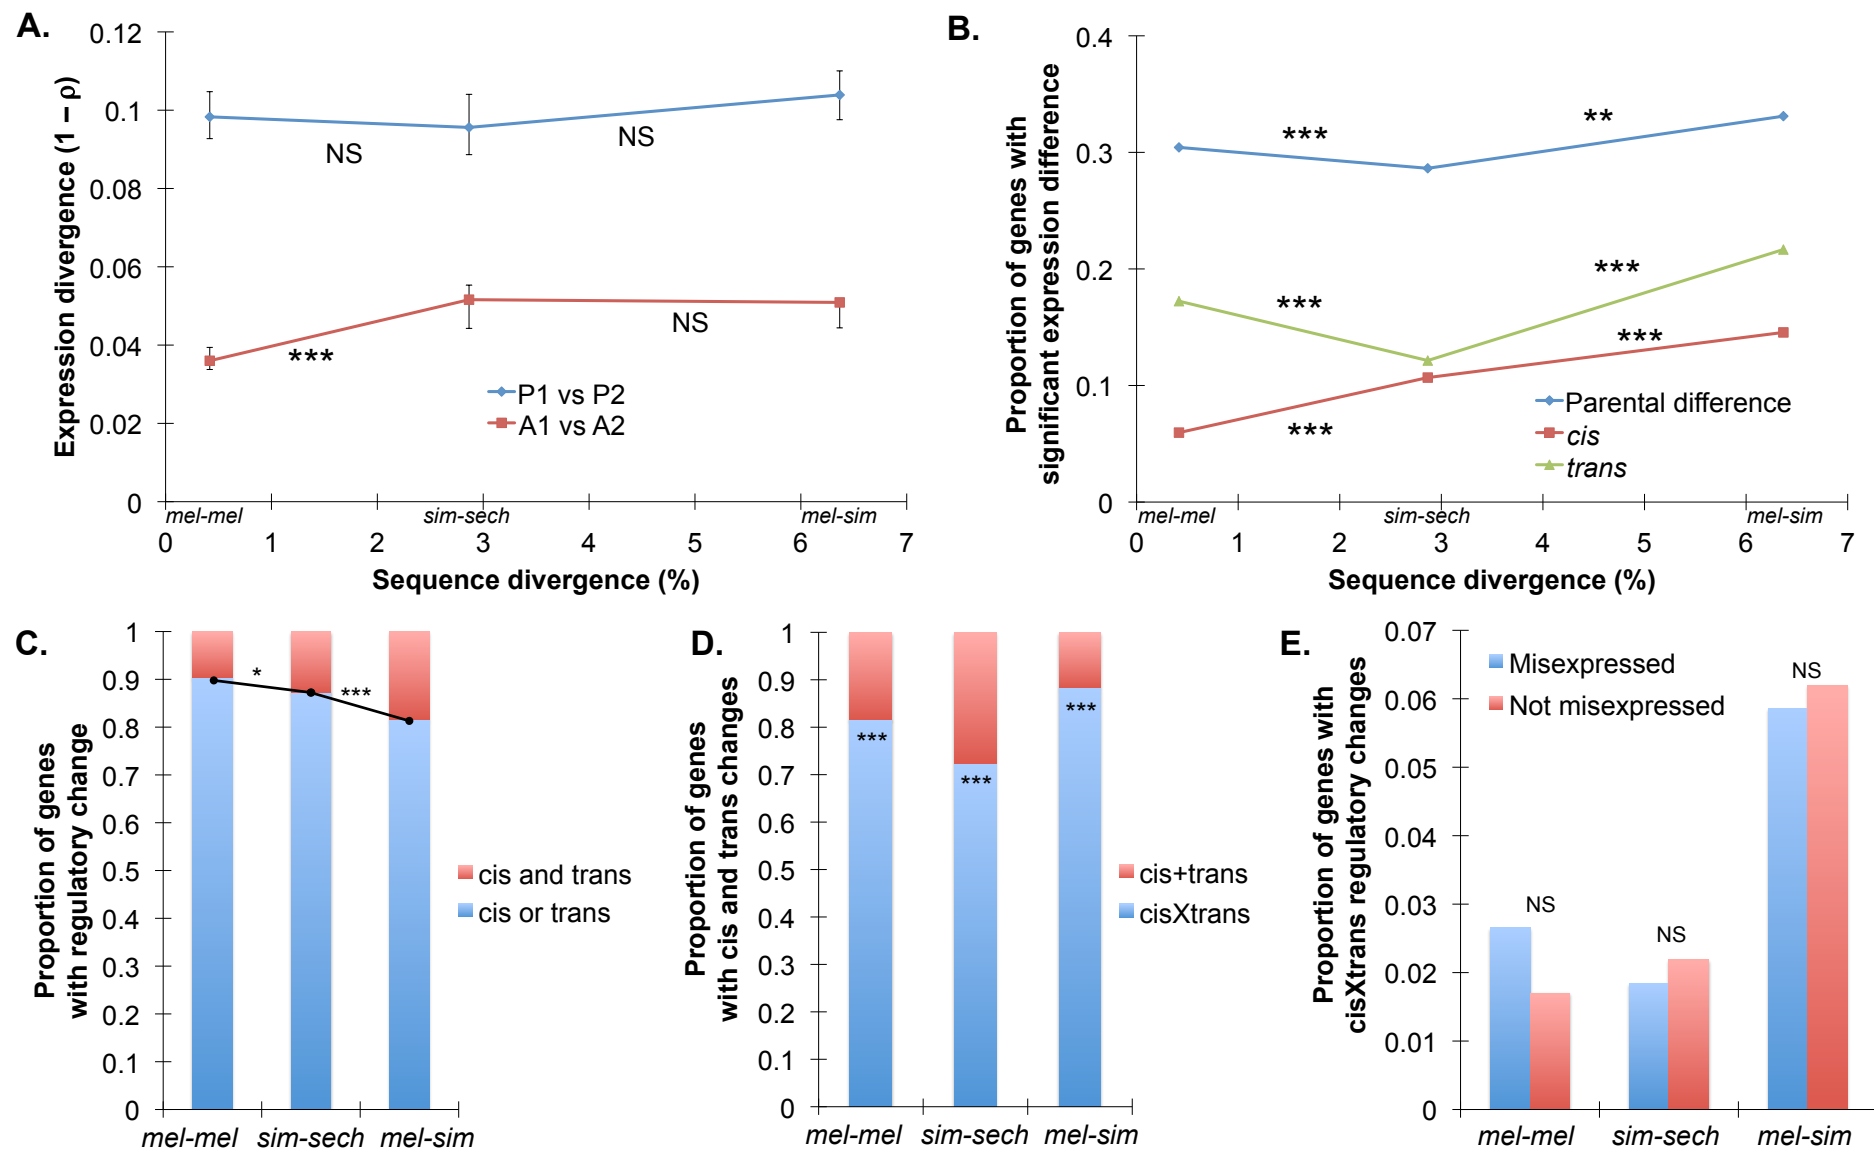

Figure S13

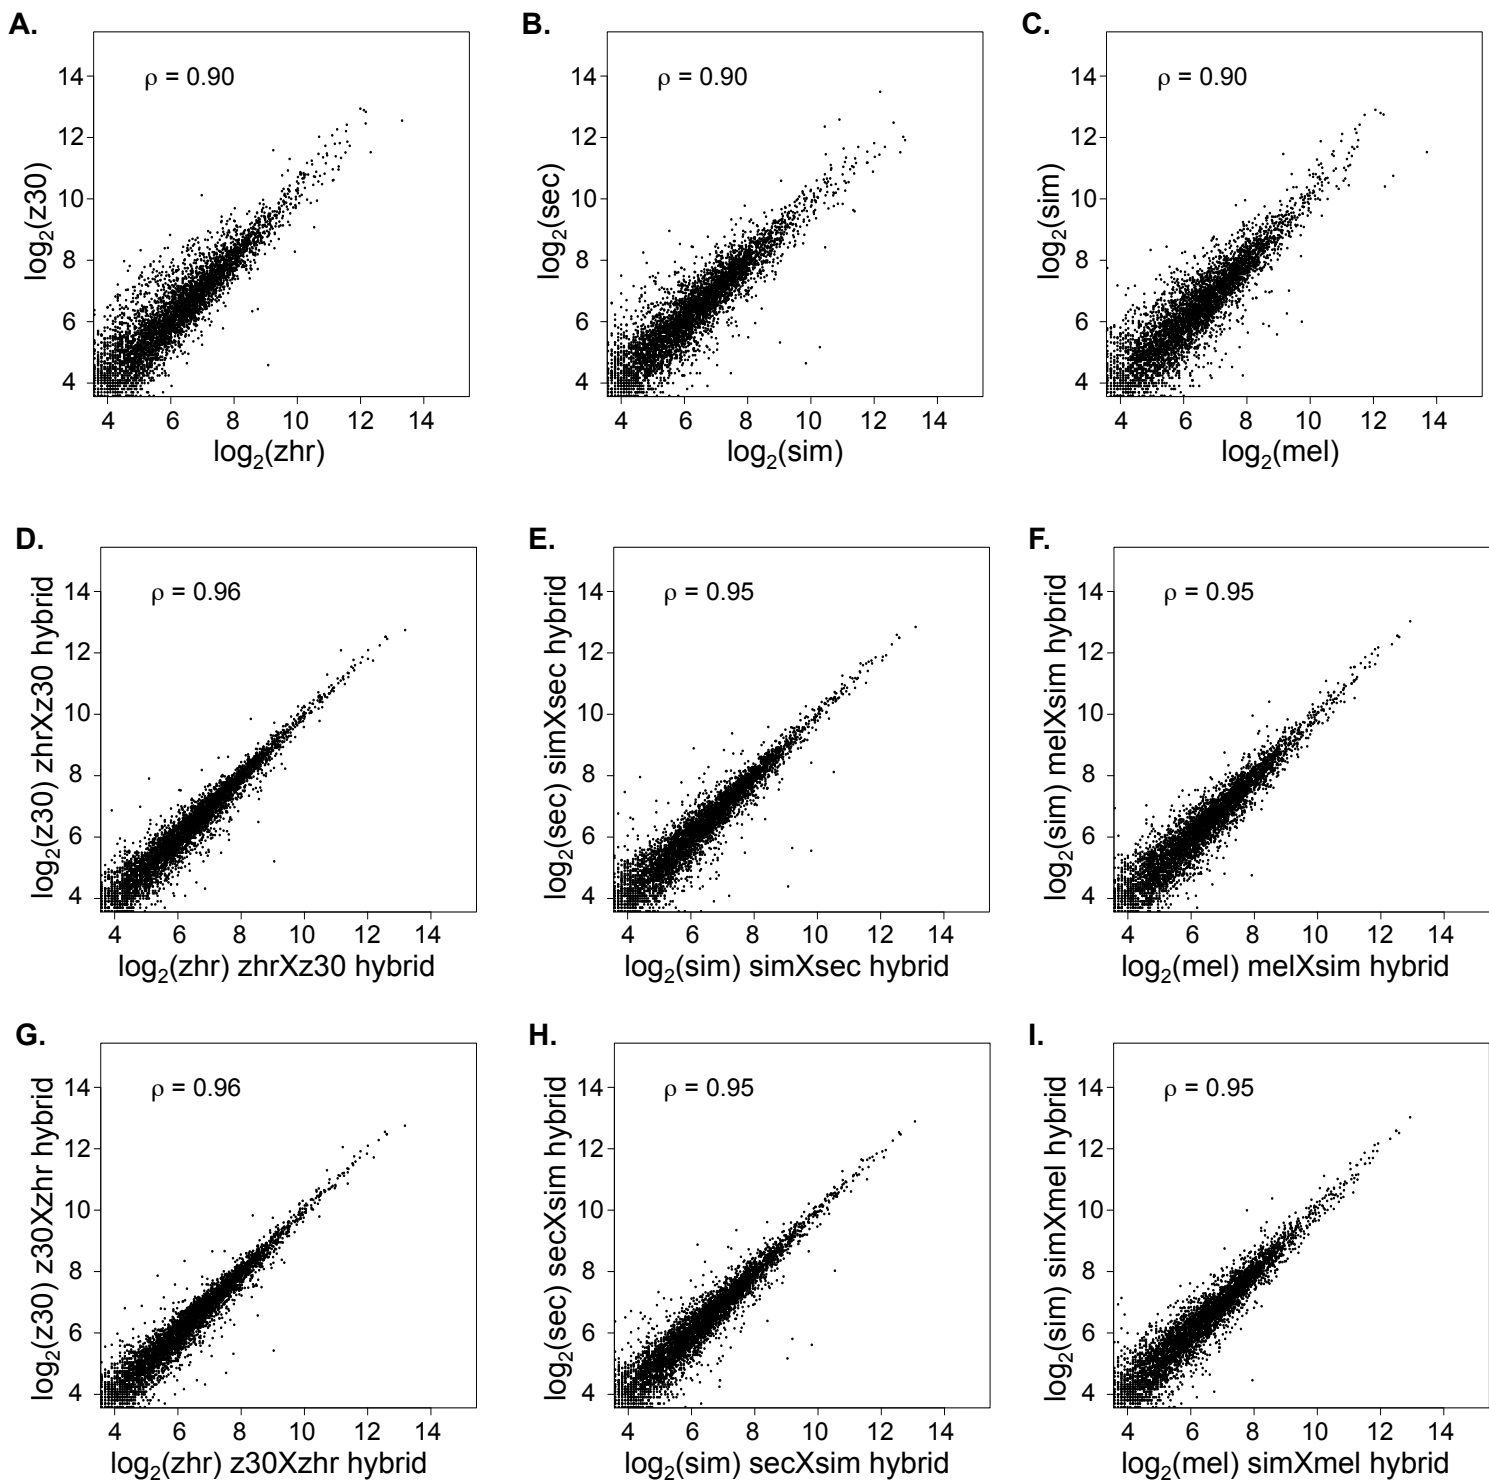



Figure S14

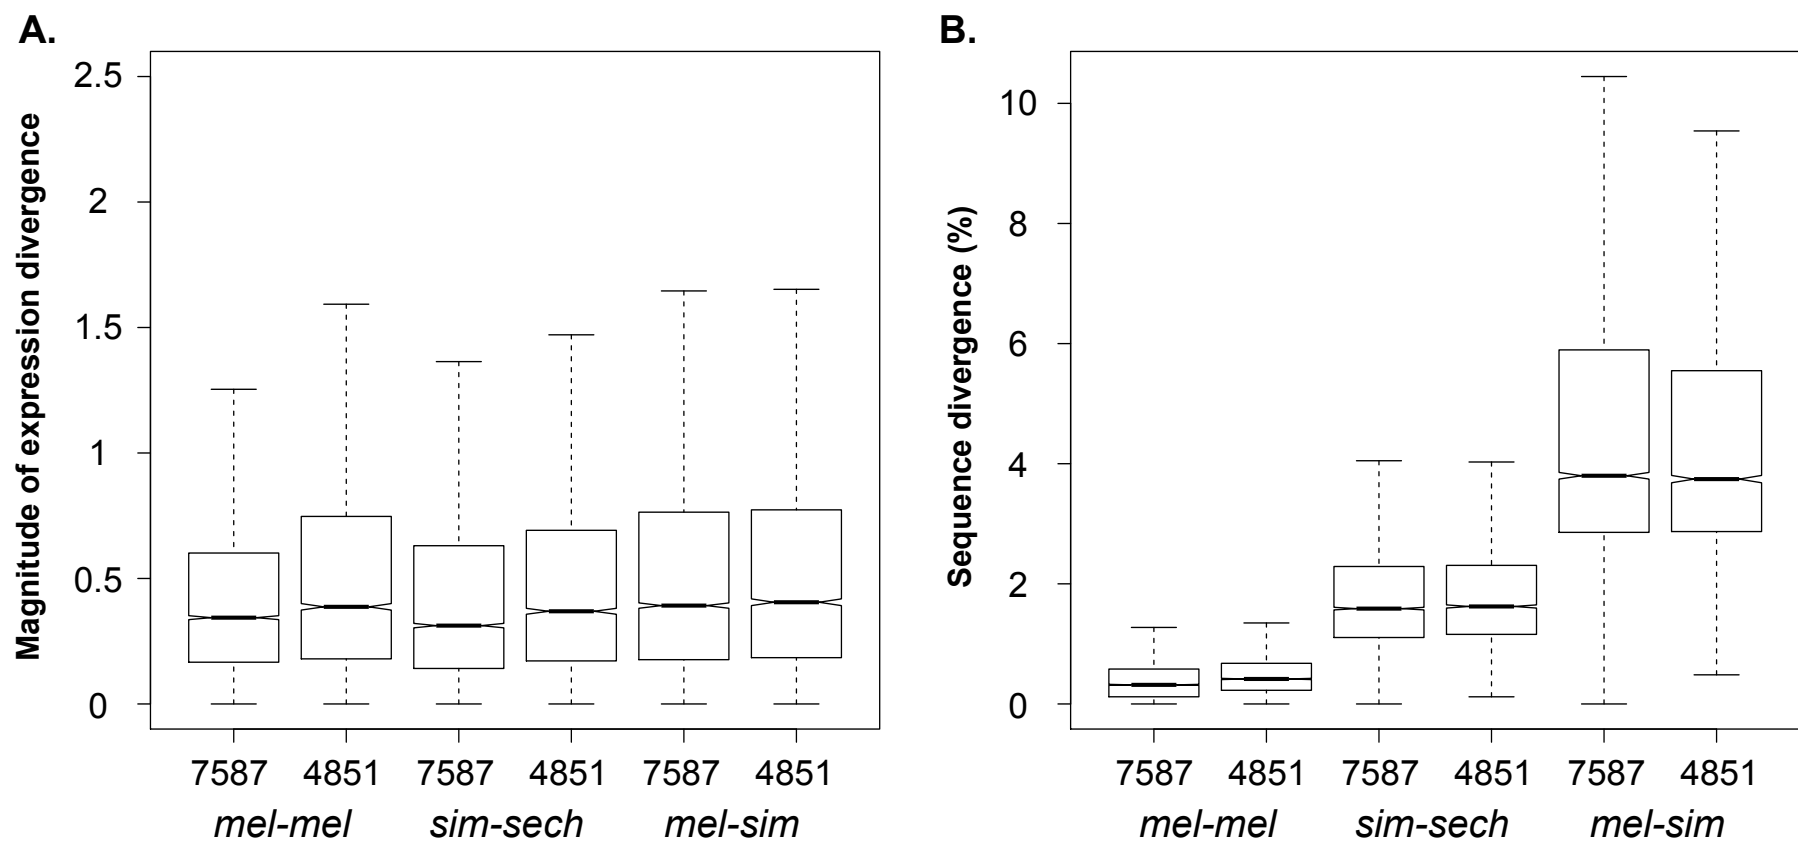

Figure S15

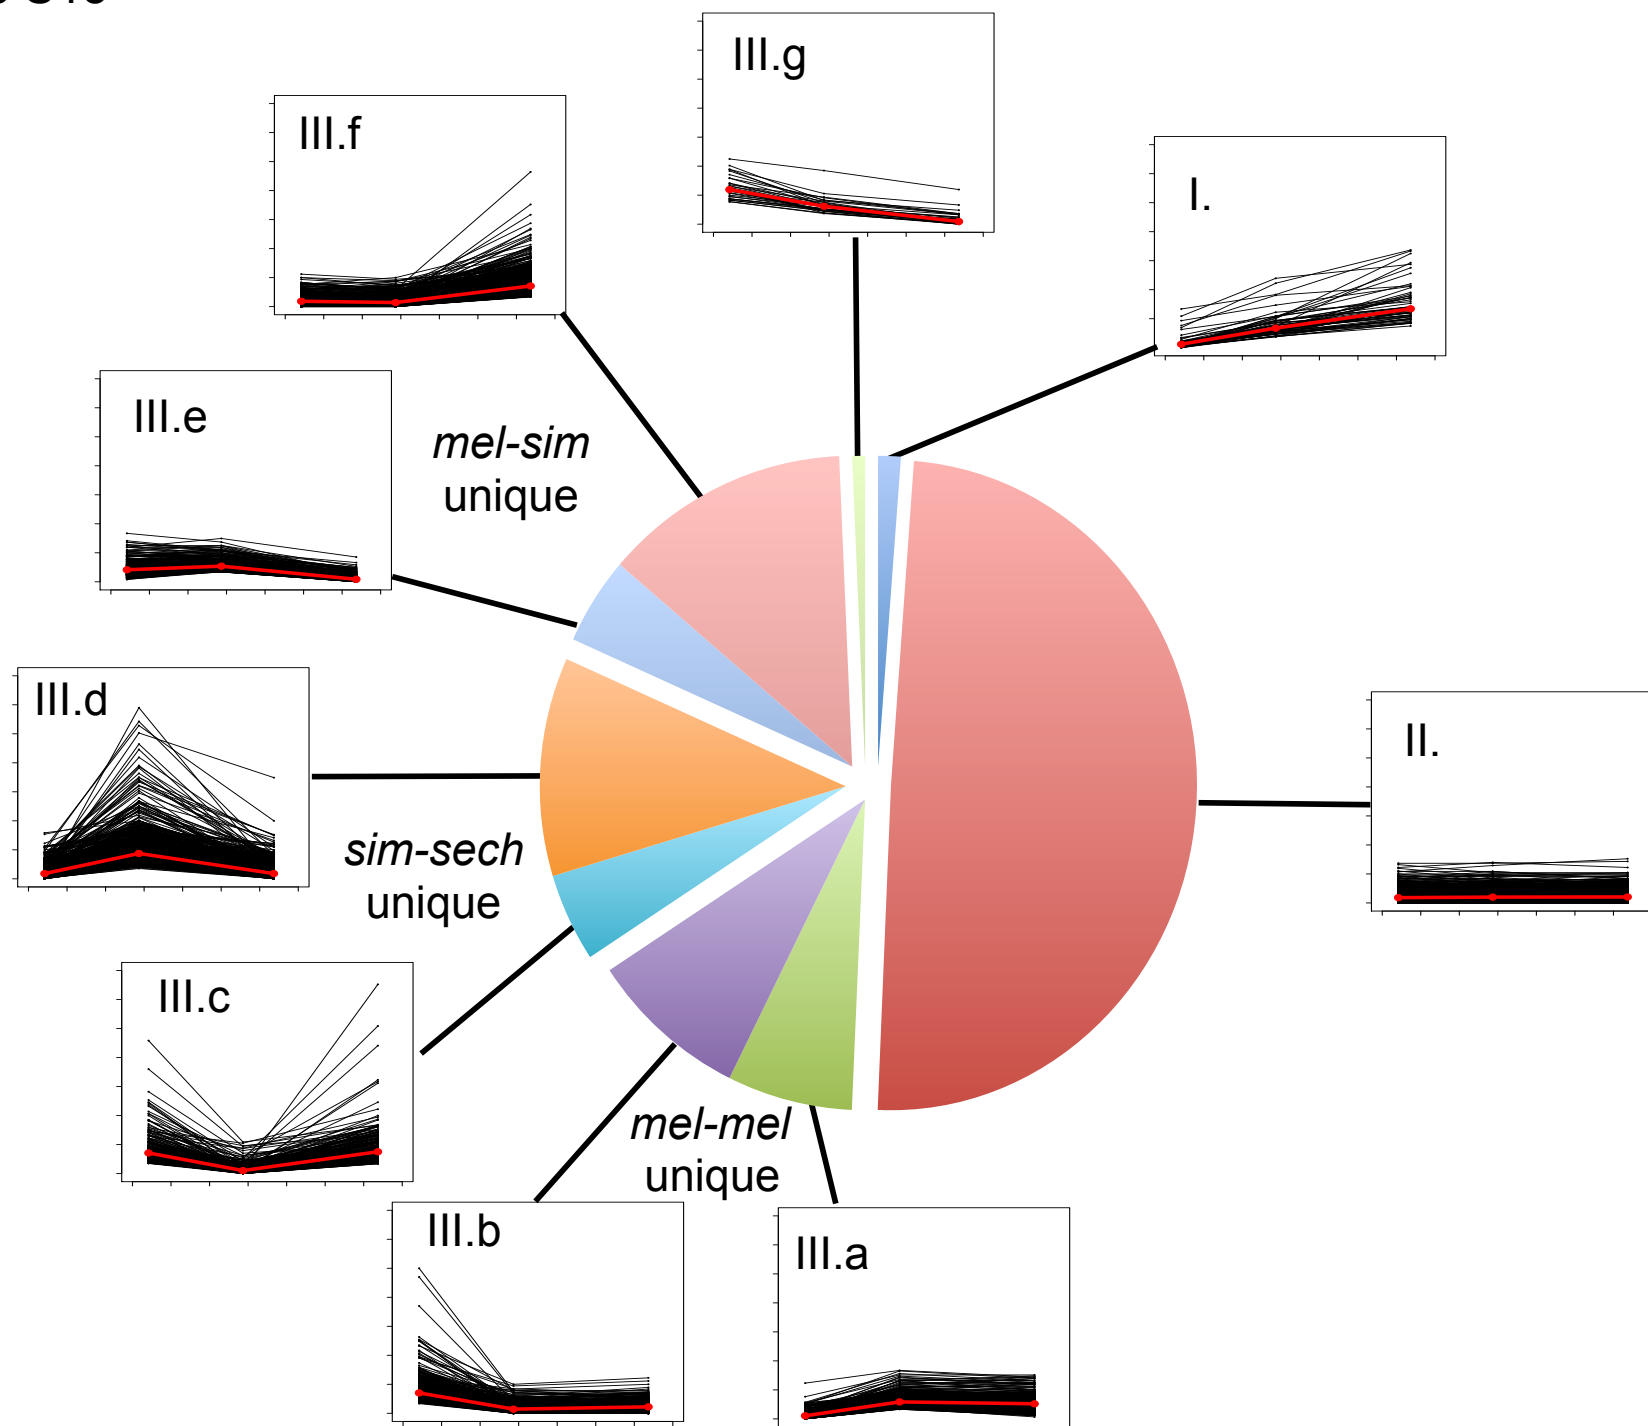

Figure S16

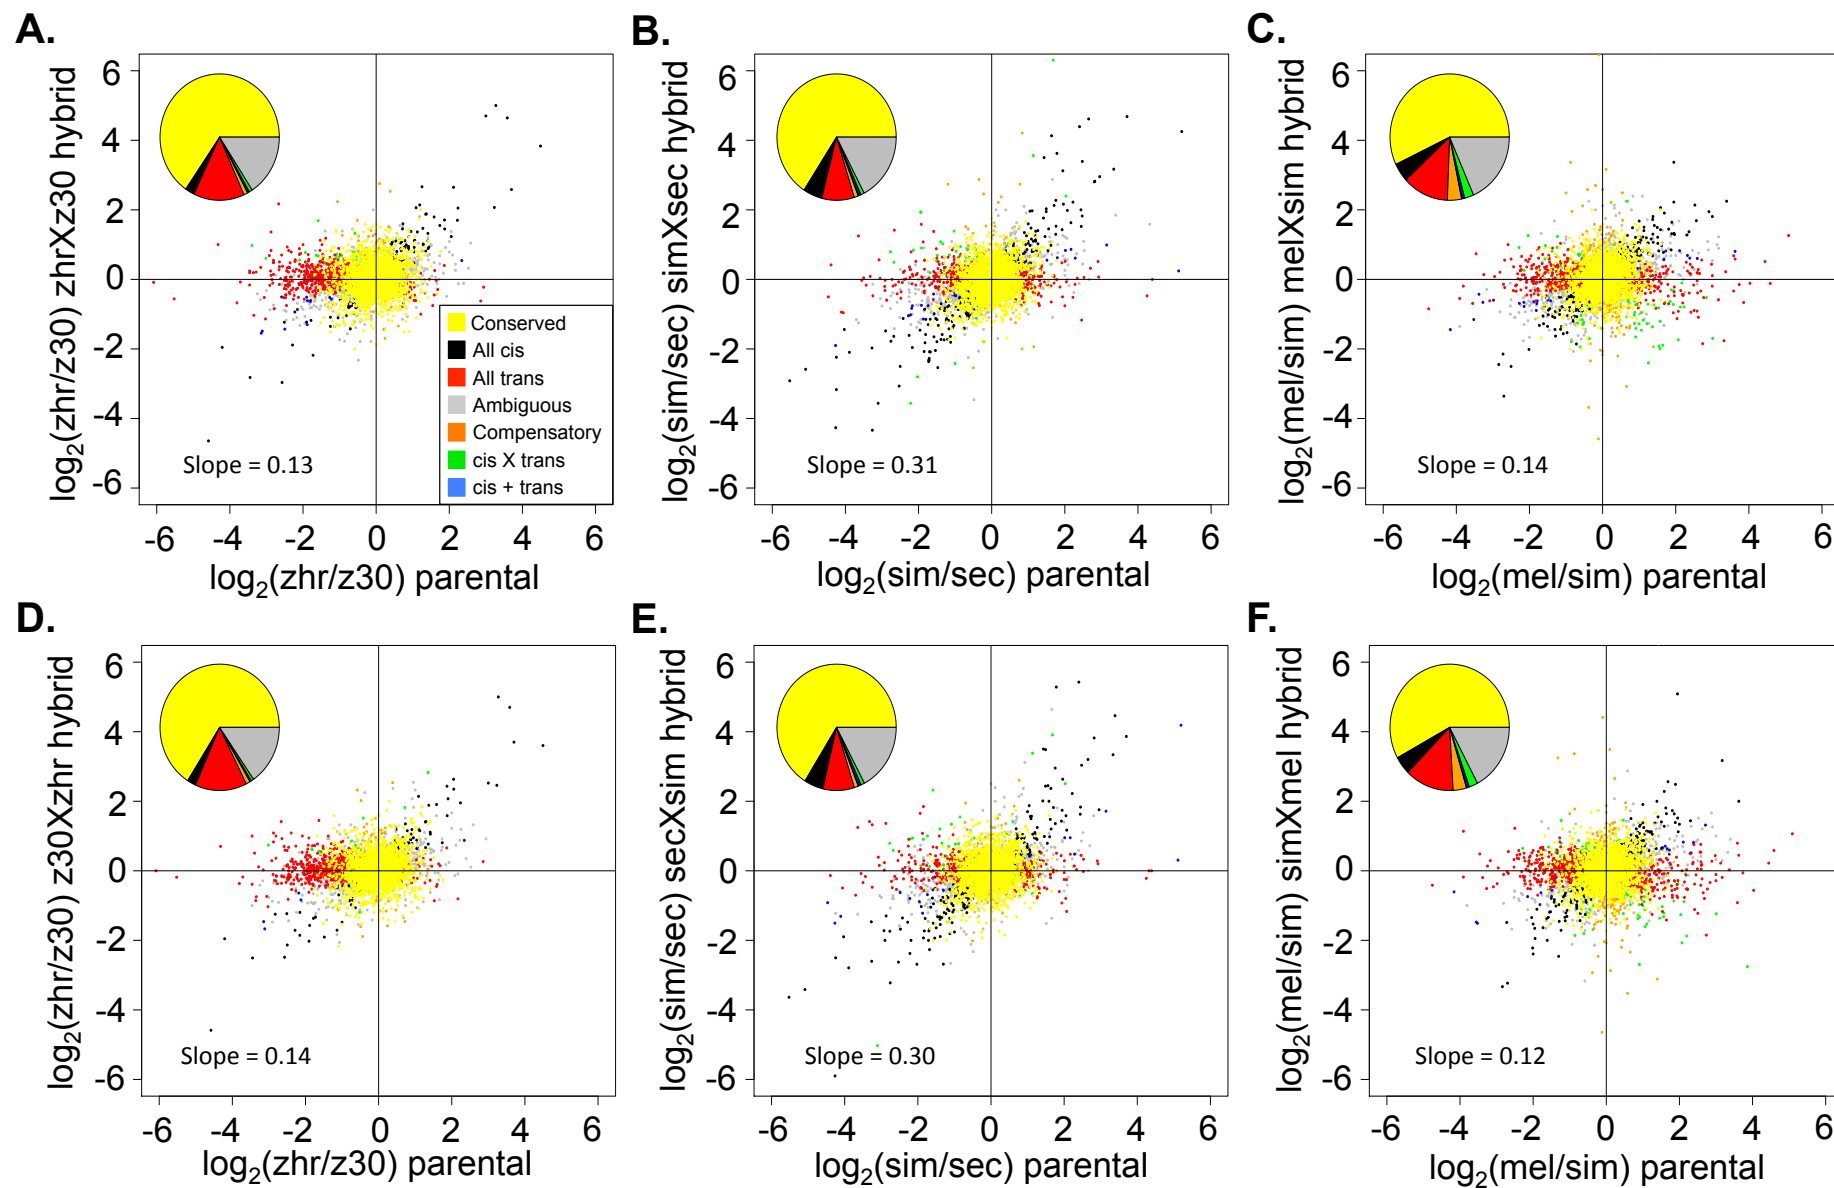

Figure S17

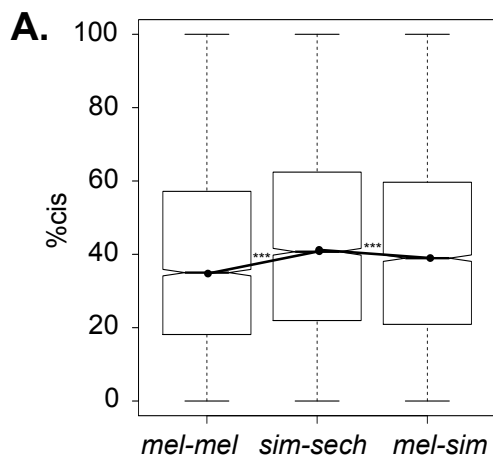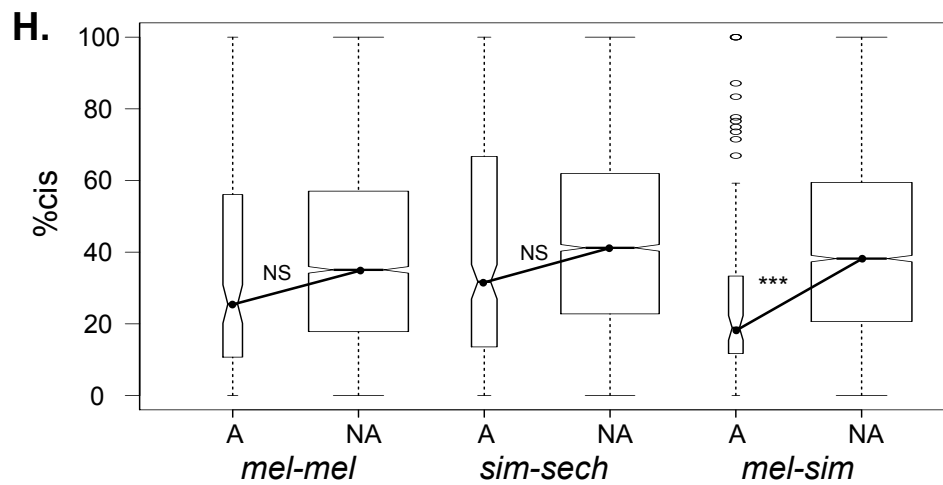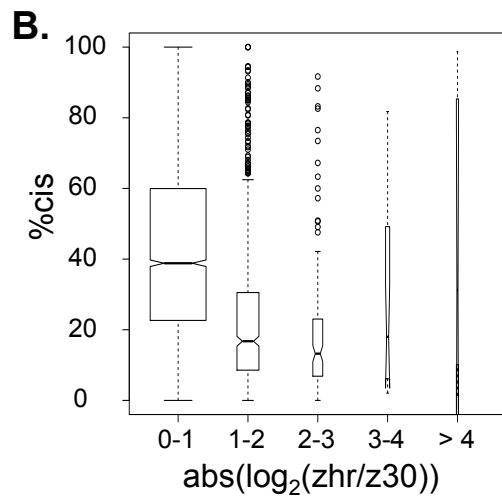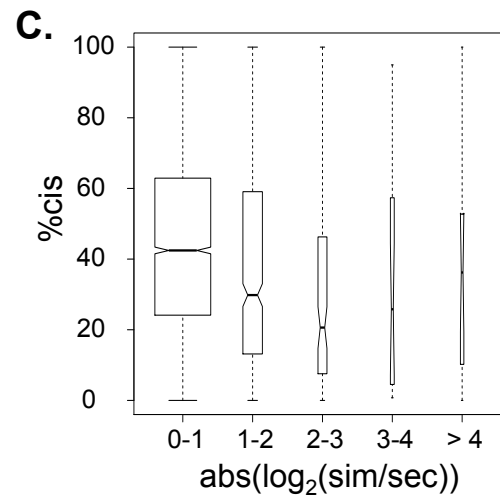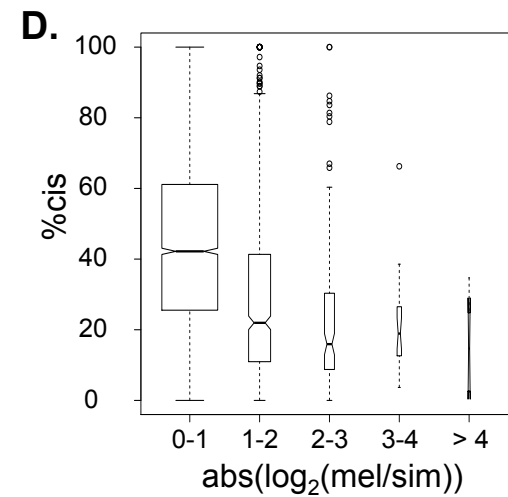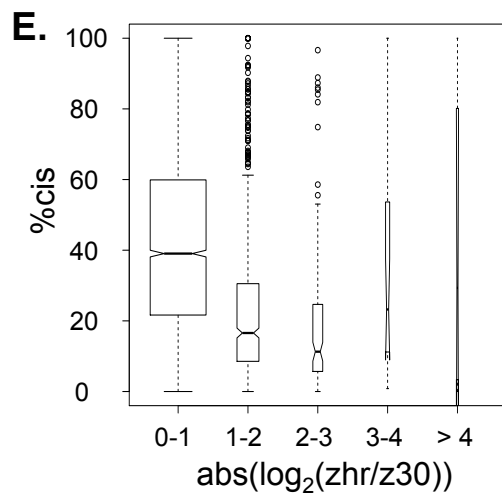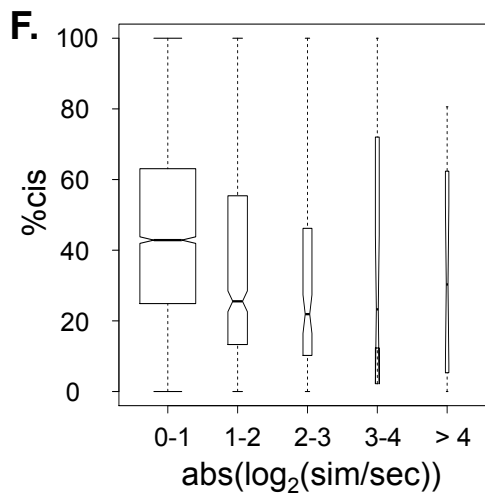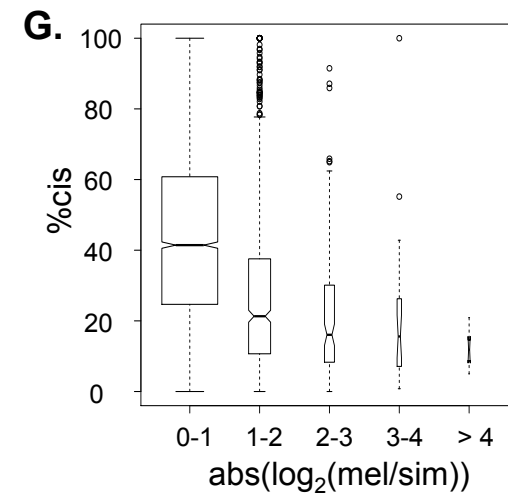

|                                | <b>cDNA</b> | <b>gDNA</b> |  |  |  |
|--------------------------------|-------------|-------------|--|--|--|
| <b><i>Single genotypes</i></b> |             |             |  |  |  |
| <i>D. melanogaster</i> (zhr)   | 16464075    | 27051150*   |  |  |  |
| <i>D. melanogaster</i> (z30)   | 21806797    | 25863911    |  |  |  |
| <i>D. simulans</i> (sim)       | 18006673    | 31859837    |  |  |  |
| <i>D. sechellia</i> (sech)     | 15817452    | 27706737    |  |  |  |
|                                |             |             |  |  |  |
|                                |             |             |  |  |  |
|                                |             |             |  |  |  |
| <b><i>F1 hybrids</i></b>       |             |             |  |  |  |
| <i>zhr</i> X <i>z30</i>        | 31432754    |             |  |  |  |
| <i>z30</i> X <i>zhr</i>        | 31439998    |             |  |  |  |
| <i>sim</i> X <i>sech</i>       | 19787136    |             |  |  |  |
| <i>sech</i> X <i>sim</i>       | 20059660    |             |  |  |  |
| <i>zhr</i> X <i>sim</i>        | 23929242    |             |  |  |  |
| <i>sim</i> X <i>zhr</i>        | 25875801    |             |  |  |  |
|                                |             |             |  |  |  |

\*This dataset was supplemented with an additional 15692412 single end reads from *D. melanogaster* *zhr* qDNA.

| Table S2. Number of genes suitable for quantifying total expression in each genotype. |                   |                       |                             |                              |
|---------------------------------------------------------------------------------------|-------------------|-----------------------|-----------------------------|------------------------------|
| Dataset                                                                               |                   |                       |                             |                              |
| <b>Parental genotypes</b>                                                             | <b>Comparison</b> | <b># mapped reads</b> | <b># after downsampling</b> | <b># genes &gt; 20 reads</b> |
| <i>D. melanogaster</i> zhr                                                            | <i>mel-mel</i>    | 12915170              | 12704991                    | 8949                         |
| <i>D. melanogaster</i> z30                                                            | <i>mel-mel</i>    | 18231082              | 12704991                    | 9191                         |
| <i>D. simulans</i> Tsimbazaza                                                         | <i>sim-sech</i>   | 14811651              | 12704991                    | 9257                         |
| <i>D. sechellia</i> droSec1                                                           | <i>sim-sech</i>   | 12704991              | 12704991                    | 8981                         |
| <i>D. melanogaster</i> zhr                                                            | <i>mel-sim</i>    | 12905538              | 12704991                    | 8947                         |
| <i>D. simulans</i> Tsimbazaza                                                         | <i>mel-sim</i>    | 14818358              | 12704991                    | 9259                         |
|                                                                                       |                   |                       |                             |                              |
| <b>F<sub>1</sub> hybrids</b>                                                          |                   |                       |                             |                              |
| <i>D. melanogaster</i> zhr X <i>D. melanogaster</i> z30                               | <i>mel-mel</i>    | 25957434              | 12704991                    | 9204                         |
| <i>D. melanogaster</i> z30 X <i>D. melanogaster</i> zhr                               | <i>mel-mel</i>    | 26515174              | 12704991                    | 8978                         |
| <i>D. simulans</i> Tsimbazaza X <i>D. sechellia</i> droSec1                           | <i>sim-sech</i>   | 17169600              | 12704991                    | 8477                         |
| <i>D. sechellia</i> droSec1 X <i>D. simulans</i> Tsimbazaza                           | <i>sim-sech</i>   | 17517914              | 12704991                    | 8484                         |
| <i>D. melanogaster</i> zhr X <i>D. simulans</i> Tsimbazaza                            | <i>mel-sim</i>    | 19484335              | 12704991                    | 9307                         |
| <i>D. simulans</i> Tsimbazaza X <i>D. melanogaster</i> zhr                            | <i>mel-sim</i>    | 20936819              | 12704991                    | 9215                         |
|                                                                                       |                   |                       |                             |                              |
| <b>All samples</b>                                                                    |                   |                       |                             | 7587                         |

| Table S3. Number of genes suitable for quantifying allele-specific expression in each genotype. |                                     |                |                               |                      |               |              |
|-------------------------------------------------------------------------------------------------|-------------------------------------|----------------|-------------------------------|----------------------|---------------|--------------|
| Comparison                                                                                      | # with <10% mapping to wrong allele | # (A1+A2) ≥ 20 | # in all three per comparison | # in all comparisons | # "imprinted" | Final number |
| <b><i>mel-mel</i></b>                                                                           |                                     |                |                               |                      |               |              |
| parents vs hybrid 1                                                                             |                                     | 6126           |                               |                      |               |              |
| parents vs hybrid 2                                                                             |                                     | 6003           |                               |                      |               |              |
| hybrid 1 vs hybrid 2                                                                            |                                     | 5954           |                               |                      | 9             |              |
| parents                                                                                         | 12433                               |                | 5921                          | 4860                 |               | 4851         |
| <b><i>sim-sech</i></b>                                                                          |                                     |                |                               |                      |               |              |
| parents vs hybrid 1                                                                             |                                     | 7274           |                               |                      |               |              |
| parents vs hybrid 2                                                                             |                                     | 7279           |                               |                      |               |              |
| hybrid 1 vs hybrid 2                                                                            |                                     | 7159           |                               |                      | 0             |              |
| parents                                                                                         | 12325                               |                | 7149                          | 4860                 |               | 4851         |
| <b><i>mel-sim</i></b>                                                                           |                                     |                |                               |                      |               |              |
| parents vs hybrid 1                                                                             |                                     | 8602           |                               |                      |               |              |
| parents vs hybrid 2                                                                             |                                     | 8526           |                               |                      |               |              |
| hybrid 1 vs hybrid 2                                                                            |                                     | 8592           |                               |                      | 0             |              |
| parents                                                                                         | 13281                               |                | 8439                          | 4860                 |               | 4851         |

**Table S4. Accuracy of mapping maternally inherited mitochondrial alleles in interspecific F1 hybrids.**

| Hybrid cross                                                | # correct | Total # | % correct |  |  |  |
|-------------------------------------------------------------|-----------|---------|-----------|--|--|--|
| <i>D. simulans</i> Tsimbazaza X <i>D. sechellia</i> droSec1 | 4879      | 4905    | 99.47     |  |  |  |
| <i>D. sechellia</i> droSec1 X <i>D. simulans</i> Tsimbazaza | 9304      | 9357    | 99.43     |  |  |  |
| <i>D. melanogaster</i> zhr X <i>D. simulans</i> Tsimbazaza  | 34791     | 34833   | 99.88     |  |  |  |
| <i>D. simulans</i> Tsimbazaza X <i>D. melanogaster</i> zhr  | 18257     | 18290   | 99.82     |  |  |  |



| Table S5. Criteria for assigning genes to regulatory evolution classes.                             |                                |                                  |                    |                                   |  |
|-----------------------------------------------------------------------------------------------------|--------------------------------|----------------------------------|--------------------|-----------------------------------|--|
| Classification                                                                                      | Fisher exact test <sup>1</sup> | Binomial exact test <sup>2</sup> | Fisher exact test  | Additional criteria               |  |
| conserved                                                                                           | $P1 = P2$                      | $A1 = A2$                        | $P1/P2 = A1/A2$    | N/A                               |  |
| all cis                                                                                             | $P1 \neq P2$                   | $A1 \neq A2$                     | $P1/P2 = A1/A2$    | N/A                               |  |
| all trans                                                                                           | $P1 \neq P2$                   | $A1 = A2$                        | $P1/P2 \neq A1/A2$ | N/A                               |  |
| cis+trans                                                                                           | $P1 \neq P2$                   | $A1 \neq A2$                     | $P1/P2 \neq A1/A2$ | $\log_2(P1/P2)/\log_2(A1/A2) > 1$ |  |
| cisXtrans                                                                                           | $P1 \neq P2$                   | $A1 \neq A2$                     | $P1/P2 \neq A1/A2$ | $\log_2(P1/P2)/\log_2(A1/A2) < 1$ |  |
| compensatory                                                                                        | $P1 = P2$                      | $A1 \neq A2$                     | $P1/P2 \neq A1/A2$ | N/A                               |  |
| ambiguous                                                                                           | $P1 \neq P2$                   | $A1 = A2$                        | $P1/P2 = A1/A2$    | N/A                               |  |
| ambiguous                                                                                           | $P1 = P2$                      | $A1 \neq A2$                     | $P1/P2 = A1/A2$    | N/A                               |  |
| ambiguous                                                                                           | $P1 = P2$                      | $A1 = A2$                        | $P1/P2 \neq A1/A2$ | N/A                               |  |
| <sup>1</sup> Compares expression between parental genotype 1 (P1) and parental genotype 2 (P2).     |                                |                                  |                    |                                   |  |
| <sup>2</sup> Compares expression between allele 1 (A1) and allele 2 (A2) in F <sub>1</sub> hybrids. |                                |                                  |                    |                                   |  |

Table S6: Pyrosequencing assays for quantification of allelic expression ratios

| <i>mel-mel</i> |        |                          |                           |                     |                                  |                           |                                         |
|----------------|--------|--------------------------|---------------------------|---------------------|----------------------------------|---------------------------|-----------------------------------------|
| Gene           | Biotin | Forward primer           | Reverse primer            | Pyro primer         | Sequence to analyze <sup>3</sup> | Dispensation <sup>3</sup> | Formula ( <i>zhr/z30</i> ) <sup>4</sup> |
| CG12819        | F      | GAGCAATGACGACTCAAGTGAGA  | GGCCGCTTCGCTCAATTGA       | GCAITGGATGAGCAG     | KTACTTTG GTTTTGGGC TTCTCTGT      | cTGTcACTG                 | (G1+T2)/T1                              |
| CG17530        | R      | AACTTTCTCAAGGGACAGGATTA  | ATCCGCAATGGTCAGTTGA       | CAGGATTACATTGCTGG   | SAATCAAC TGACCAATTGC GGATTTC     | cCGATCACT                 | C1/G1                                   |
| CG18444        | F      | ACTGCGCTGCAGGGAGAT       | TTGGATGGCCGCAATTGTC       | ATGGCCGCAATTGTCG    | GYGGCTCT GCTACCACCA TCAGCAGCT    | aCGTaGCTCTG               | C1/T1                                   |
| CG6253         | F      | ACCGCTTCAAGCTGCGTTATG    | TGGTGCCTTCTTCAGTGTG       | CAGCTTGTTCGCTG      | RCGCTTGG CATAACGCAG CTTGAAGC     | cAGCGCTGC                 | (A1*0.86)/G1                            |
| CG6906         | R      | TCCGAGATTGACCCGAAAG      | TCGCCAGTGGAGTGGAT         | AAAGGCAAGAGCGTTA    | AYATGACC AATCCACTTC CACTGGCG     | gATCgATGAC                | T1/C1                                   |
| CG7269         | F      | AGGGGTGCCACCCACAAT       | AAAGGACGAGGAGACCTCAAG     | GAGCGGCACCCGCA      | YATTGTGG TGGGCACCCC TGGCCGAA     | gCTgATGTGT                | T1/C1                                   |
| CG7874         | F      | GTGGCCAGAGGTTTCGAGC      | CTTCAGCTCCCGCTTGAT        | CTCCTGTCGGGCAC      | RATCTCGG TCCAGTCATA GCGCCAGC     | gAGAcTCTGC                | (A1*0.86)/(G1+(A2*0.86))                |
| CG9089         | R      | GCGTGGCCATTGGACTTAG      | CCAACGATACCTCCAAGGATCT    | CCATTGGACTTAGCCTT   | YGAGGGAG ATCCTTTGGA GGTATCGT     | aCTaGAGAGAT               | C1/T1                                   |
| CG9497         | R      | CCTTTCTGCGGTGCCT         | CGAGAAGATCGGCAAGTACATG    | GTTCCAAGTTGGCCC     | KCTGATTT TGCATGTACT TGCCGATC     | aTGaCTGA                  | T1/G1                                   |
| CG9916         | F      | GAAACCCAACTGTCTATTGAAAA  | TCGAATCTTATGGATCGCAGTC    | GGTTCTCTTTAAGAAGGTG | YGATGCAA AAGCAACAGC AACATTGC     | gCTaGATGC                 | T1/C1                                   |
| <i>sim-sec</i> |        |                          |                           |                     |                                  |                           |                                         |
| Gene           | Biotin | Forward primer           | Reverse primer            | Pyro primer         | Sequence to analyze              | Dispensation              | Formula ( <i>sim/sec</i> )              |
| CG1644         | F      | TTCTCGCAACCCATTGTGTC     | ATCCGGCTCTGATCAAGCG       | AGACGACTGATCCAC     | TTGYGACACA ATGGGTTCCG AGAACCTT   | aTTTGTaGAC                | C1/T4                                   |
| CG2233         | R      | AAGGGACCGGAAAAATGT       | AACACCTCTTCGCCAGACT       | AAAGGCGGGAAATC      | GWGGAGTCTG GCGAAGAGGG TGTTCCT    | cGATcGAGTC                | T1/A1                                   |
| CG3209         | F      | TGTGCGATGTGTGTACCTG      | CACCTCTCTTTGGCTTCAATG     | CGATGACGCTCTTCAC    | KCGGTTCCGCG AAGTCGATCG CCGACT    | aGTaCGTCCG                | G1/T1                                   |
| CG4703         | F      | CTCGTTCGCGGTGGTAA        | GAAATCTCAAGGGGATGTGC      | CCCTGTATCTGGGACC    | RCTTCTCTCC TTTGGAACG ATGCC       | tAGtCTCTCT                | G1/A1                                   |
| CG4783         | F      | GGCAGAAAAACAGAAATC       | ATCCGAAAGTTGGAGCTCA       | GTCGTACAATCCACATA   | MGAITTTCTGG TTTTCTGTGC CAACTG    | gACtGATCTG                | C1/A1                                   |
| CG4797         | R      | CACCTATTTTGGCCGGCTATA    | CGCGACTACTTGGTTACATAAAGG  | TTTGGCCGGCTATAATG   | TASTTCAAGT TGTTTAGTTC AAGTTGTT   | cTACGaTCAG                | G1/C2                                   |
| CG5269         | F      | CAATCAAAAGTTCCAGCTTACA   | TAATCGTTCGACAATAGGGATAGG  | CCAATGAGCCCTTGG     | GYGCCAATAG TCTTATGTAG GCTGGAA    | hGCTaGCATA                | T2/C1                                   |
| CG6201         | R      | GTATTCGCTTGGGTCGTACTG    | CACACAATGCCGCACTTCT       | GCTGGATCGCCAGG      | GYGGCGCTAA TCCCTCTGTG ATCGATC    | cGCTaGCGCT                | T1/C2                                   |
| CG7702         | R      | ACTGCTGATCTTGCCGATGT     | TTTCCGTTTTCGGCTTCA        | AAGAAACACGCGCGA     | RTGCTGAAGC CGAAAAACGGA AACGTT    | tAGtTGCTGA                | A1/G1                                   |
| CG7923         | R      | TGTCGACGGAGCTGAGCAAT     | AGCCACACTCCAATATAGCGAAGAT | ACCGATGGCAGGAAA     | MTGRAGCTGG TATGGTTCAA TATAGT     | tACgTGAGCT                | A1/C1                                   |
| CG9009         | F      | GTCCGGGCTTTTGAGAGTTGAA   | TTCCGCCAAATGCGAGAT        | TGCCACGCGCGCTTT     | YGCCGTTCTGT CTGCAGACCA AGTTCA    | aCTaGCGCTG                | T1/C1                                   |
| CG9673         | R      | CGTATCCGGCTTCCCAAT       | TGCACTCTACAAGCAGCAGAAG    | GCGATCGGCTCAGCGT    | RTTGTAGTTG GCCTTCTGCT GCTTGT     | tAGtTGtAGT                | G1/A1                                   |
| CG10877        | F      | AAAACTTCCACACACATACATA   | TGGTTCTTTTGTGTCTACTTGT    | TGTGGGTCAACTAATCTG  | TMGCCAGTAC ACA                   | cTACtGcAGT                | A1/C2                                   |
| CG10916        | R      | AGCTCAGTATCCATAGGGACGTAG | GTCATTGTGGGTGCAGTTTCT     | TGGAAGGTACCGGCG     | SAGAAGTCTRC AGAAACTGCA CCCACA    | aCGtAGAGTC                | C1/G1                                   |
| CG11391        | R      | GTAGAGACTGGCGATTGTTTGTG  | TTGGCCTACGGTTGCTTG        | GTTGACGGCGTGAAA     | YGGAGTCCG TTGACAACG AACCGT       | aCTaGAGTCG                | T1/C1                                   |
| CG11407        | R      | TCCGATGGACAGATGTGG       | TGATCGCAAGATCTGGAGC       | CAGATGTGGGTCAAAGTAG | YATTCCAATT GGTCTCCGCT CCAGAT     | gCTgATCATG                | T1/C1                                   |
| CG15883        | R      | AAATTACGAGGCGATAGTTCCG   | GACACGTGCGACTATCCATACCT   | GCCCTTAAATAACACTG   | KAGAATCAGG TATGGATAGT CGCAGC     | aGTaGATCA                 | T1/G1                                   |
| CG17186        | F      | ATGCGGAGGAAACACGATAC     | ATTATTCGGCATCACTGG        | TTTGACAACCTCAAT     | TTGYGCTGG CTTTGTGCTT GCATCTG     | cTTTGTaGCT                | T4/C2                                   |

<sup>1</sup>Indicates whether the Forward (F) or Reverse (R) primer was biotinylated.

<sup>2</sup>Sequence immediately following the 3' end of the Pyro primer. Sites used to differentiate the two alleles are indicated with IUPAC ambiguity codes.

<sup>3</sup>Order of nucleotides added to Pyrosequencing reaction. Lowercase bases are not expected to be incorporated and serve as controls. Peak heights resulting from incorporation of the bases in bold were used to calculate relative allelic expression.

<sup>4</sup>Describes the way in which peak heights from individual bases were used to calculate relative allelic expression. Each base is indicated by XN, corresponding to the Nth occurrence of the X base. A correction factor of 0.86 was used for peaks produced by incorporation of A, as recommended by the manufacturer.
